# Supplementary material for: Genome-wide gene-environment interactions in neuroticism: an exploratory study across 25 environments
Source: PubMed Central journal article supplement (PMC7985503; doi:10.1038/s41398-021-01288-9), 2021-03-22

# Supplementary Figures

## Table of Contents

|                                                                       |    |
|-----------------------------------------------------------------------|----|
| PER ENVIRONMENT.....                                                  | 2  |
| <i>Work Satisfaction</i> .....                                        | 3  |
| <i>Townsend Deprivation Index (TDI)</i> .....                         | 5  |
| <i>Social Activities</i> .....                                        | 7  |
| <i>Felt Hated by Family Member as a Child</i> .....                   | 9  |
| <i>Able to Confide</i> .....                                          | 11 |
| <i>Diagnosed with Life-Threatening Illness</i> .....                  | 13 |
| <i>Been in a Confiding Relationship as an Adult</i> .....             | 17 |
| <i>Alcohol Intake Frequency</i> .....                                 | 19 |
| <i>Victim of Sexual Assault</i> .....                                 | 20 |
| <i>Chronic Pain</i> .....                                             | 21 |
| <i>Age Completed Full-Time Education</i> .....                        | 22 |
| <i>Family Relationship Satisfaction</i> .....                         | 23 |
| <i>Fluid Intelligence Score</i> .....                                 | 24 |
| <i>Frequency of Friend/Family Visits</i> .....                        | 25 |
| <i>Sleeplessness / Insomnia</i> .....                                 | 26 |
| <i>Long-Standing Illness, Disability, or Infirmary</i> .....          | 27 |
| <i>Health Satisfaction</i> .....                                      | 28 |
| <i>Friendships Satisfaction</i> .....                                 | 29 |
| <i>Financial Situation Satisfaction</i> .....                         | 30 |
| <i>Illness, Injury, Bereavement, Stress in the Last 2 years</i> ..... | 31 |
| <i>Smoking Status</i> .....                                           | 32 |
| <i>Physically Abused by Family as a Child</i> .....                   | 33 |
| <i>Felt Loved as a Child</i> .....                                    | 34 |
| <i>Victim of Physically Violent Crime</i> .....                       | 35 |
| <i>Body Mass Index (BMI)</i> .....                                    | 36 |
| MANHATTAN PLOTS (grouped) .....                                       | 37 |
| GWEIS .....                                                           | 38 |
| Gene Analysis .....                                                   | 40 |

# PER ENVIRONMENT

*This section contains relevant analysis plots organized by environment. For all environments, there are Manhattan plots for the GWEIS and gene-analysis, and for those with any genome-wide significant SNPs from the GWEIS (i.e. not corrected across environments), there are also annotated locus plots and interaction plots.*

## **GWEIS Manhattan plot**

Shows the  $-\log_{10} p$ -values for the SNP interaction with the environment in question. Gene names have been annotated to suggestively significant ( $p < 1e-5$ ) intragenic SNPs with the lowest  $p$ -value.

## **Locus plot**

Shows all SNPs in the genome-wide significant loci with CADD and RegulomeDB score annotations (obtained from FUMA<sup>1</sup>).

## **Interaction plots**

These plots show the average predicted neuroticism at any given combination of alleles and environmental exposure. To illustrate the components that are specific to the SNP-environment interaction of interest, we plotted neuroticism predicted from the full model (as analysed in the GWEIS, i.e. with the SNP-environment interaction term, SNP/environment/covariate main effects, and covariate-SNP/environment interaction effects) as well as using the same model but excluding the SNP-environment interaction term.

## **Gene analysis Manhattan plot**

Shows the  $-\log_{10} p$ -values for the MAGMA gene analysis (based on the GWEIS SNP-environment interaction results). Suggestively significant genes ( $p < 1e-4$ ) have been annotated.

1. Watanabe, K., Taskesen, E., van Bochoven, A. & Posthuma, D. Functional mapping and annotation of genetic associations with FUMA. *Nat. Commun.* **8**, 1826 (2017).

# Work Satisfaction

## GWEIS

### Manhattan plot

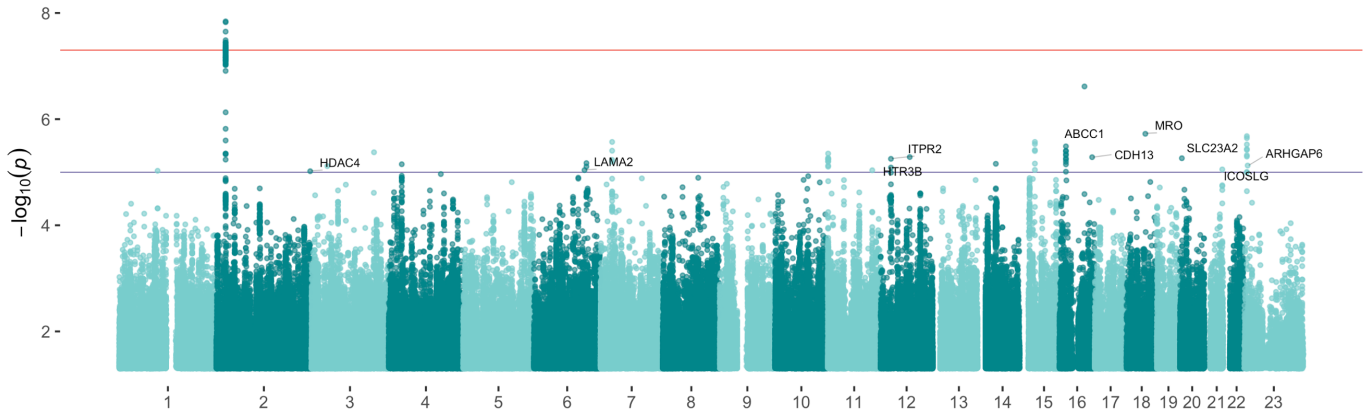

**Supplementary Figure 1.1** Manhattan plot showing the  $-\log_{10}$  SNP-environment interaction  $p$ -values from the GWEIS. Gene labels have been annotated to suggestively significant ( $p < 1e-5$ ) intragenic SNPs with the lowest  $p$ -value. (Only SNPs with  $p < .05$  were plotted).

### Locus Plot (rs4461224)

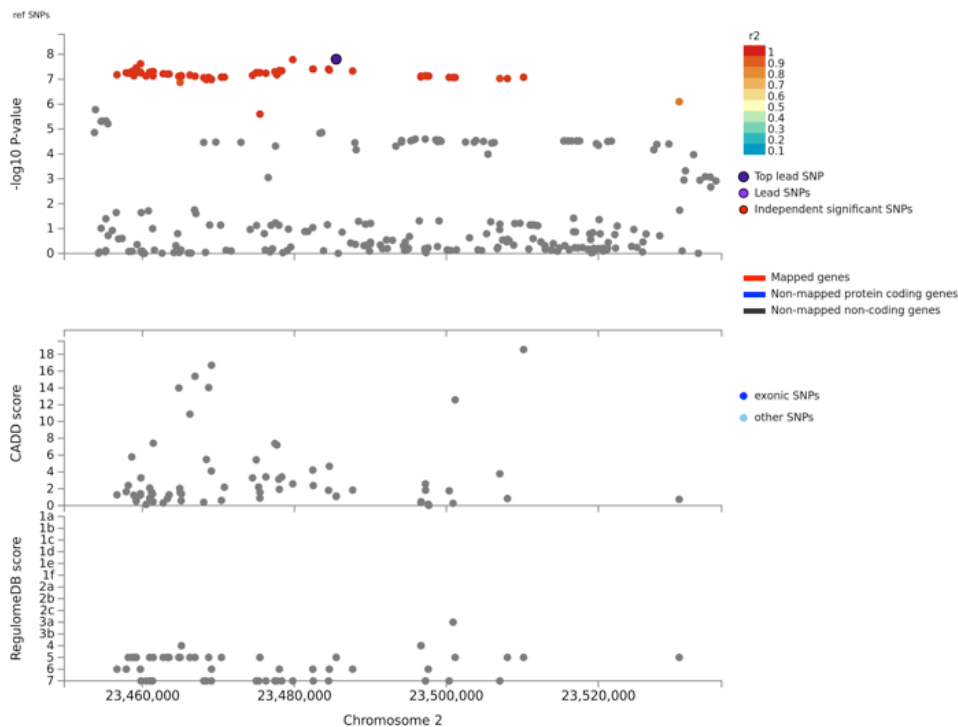

**Supplementary Figure 1.2** Annotated locus plot showing the CADD and RegulomeDB scores for the SNP that reached standard genome-wide significance ( $p < 5e-8$ ).

## Interaction Plots (rs4461224)

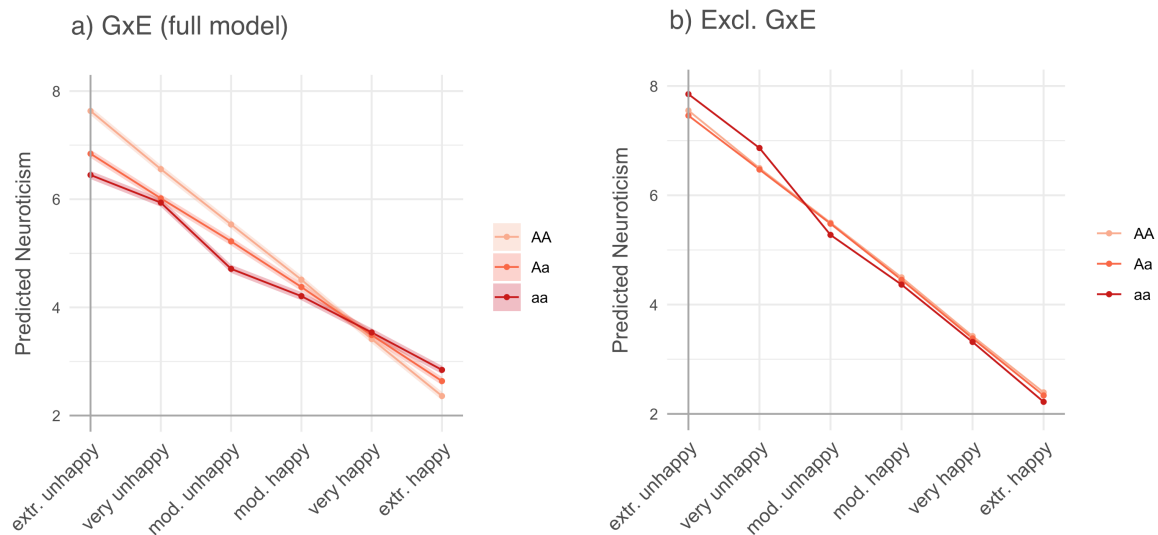

**Supplementary Figure 1.3** Average predicted neuroticism based on a) the full model (i.e., all main and interaction effects), with 95% confidence intervals for the GxE term, or b) everything except the SNP-environment interaction of interest (incl. all main effects and covariate interaction effects). Plot b will show any potential interaction effect captured by the covariates.

## Gene Analysis

### Manhattan Plot

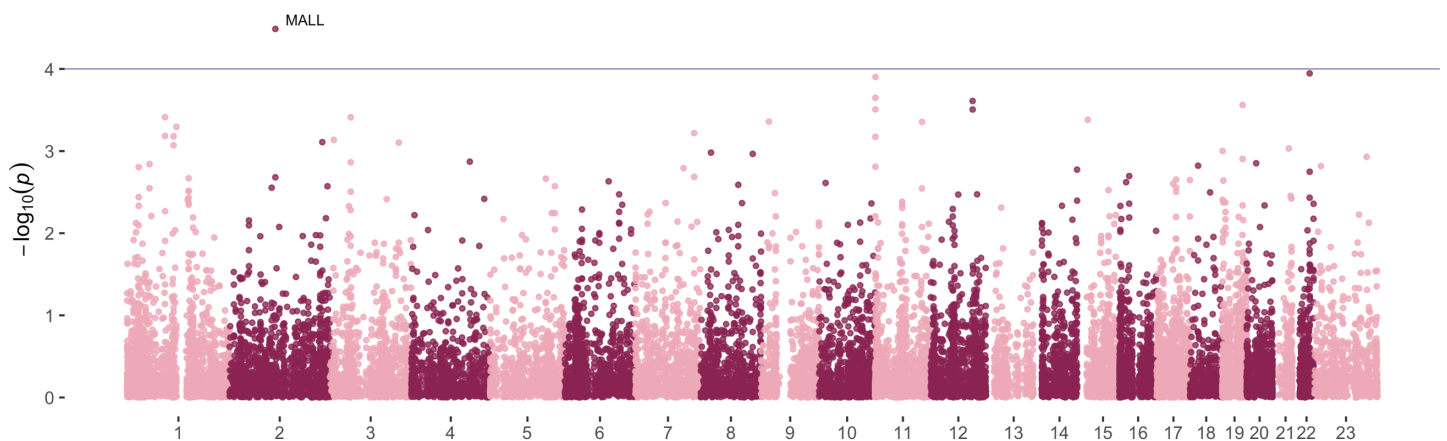

**Supplementary Figure 1.4** Manhattan plot showing the  $-\log_{10}(p)$  values for the MAGMA gene analysis (based on the GWEIS SNP-environment interaction results). Suggestively significant genes ( $p < 1e-4$ ) have been annotated.

# Townsend Deprivation Index (TDI)

## GWEIS

### Manhattan Plot

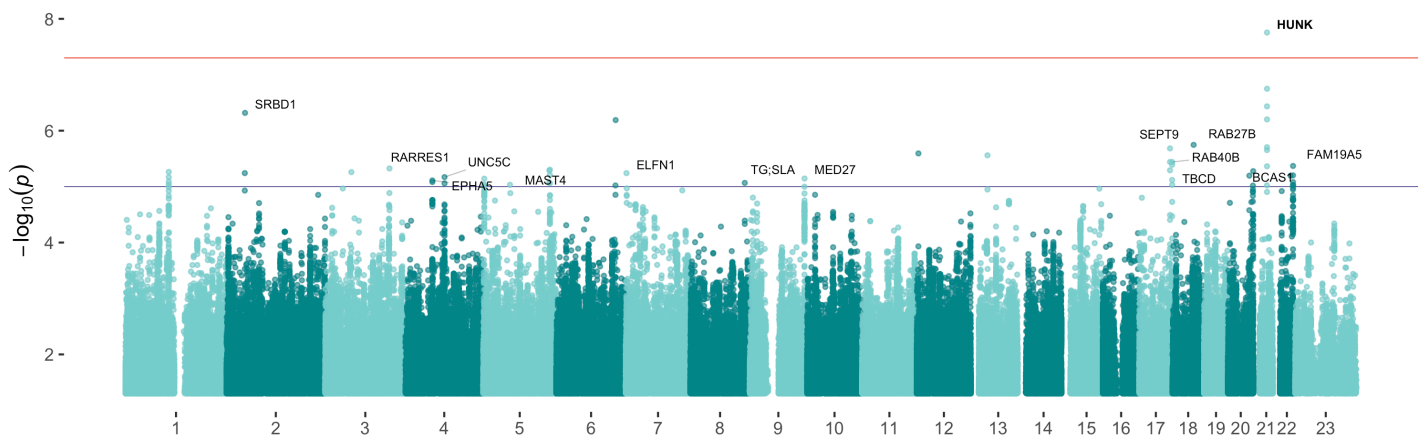

**Supplementary Figure 2.1** Manhattan plot showing the  $-\log_{10}$  SNP-environment interaction  $p$ -values from the GWEIS. Gene labels have been annotated to suggestively significant ( $p < 1e-5$ ) intragenic SNPs with the lowest  $p$ -value. (Only SNPs with  $p < .05$  were plotted).

### Locus Plot (rs11700517)

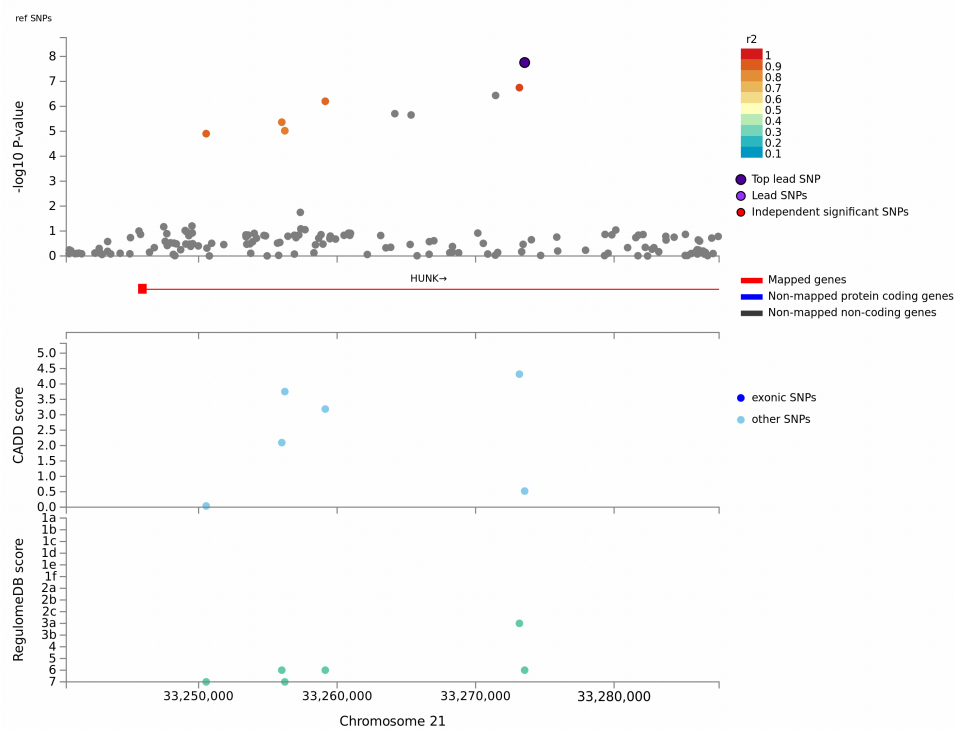

**Supplementary Figure 2.2** Annotated locus plot showing the CADD and RegulomeDB scores for the SNP that reached standard genome-wide significance ( $p < 5e-8$ ).

## Interaction Plots (rs11700517)

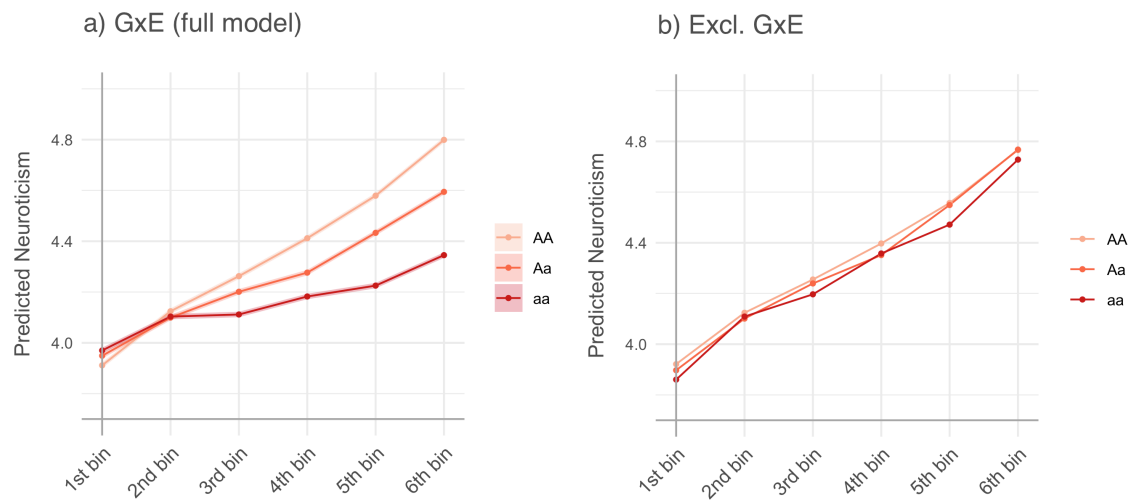

**Supplementary Figure 2.3** Average predicted neuroticism based on a) the full model (i.e., all main and interaction effects), with 95% confidence intervals for the GxE term, or b) everything except the SNP-environment interaction of interest (incl. all main effects and covariate interaction effects). Plot b will show any potential interaction effect captured by the covariates. (For plotting purposes, TDI was split into six bins).

## Gene Analysis

### Manhattan plot

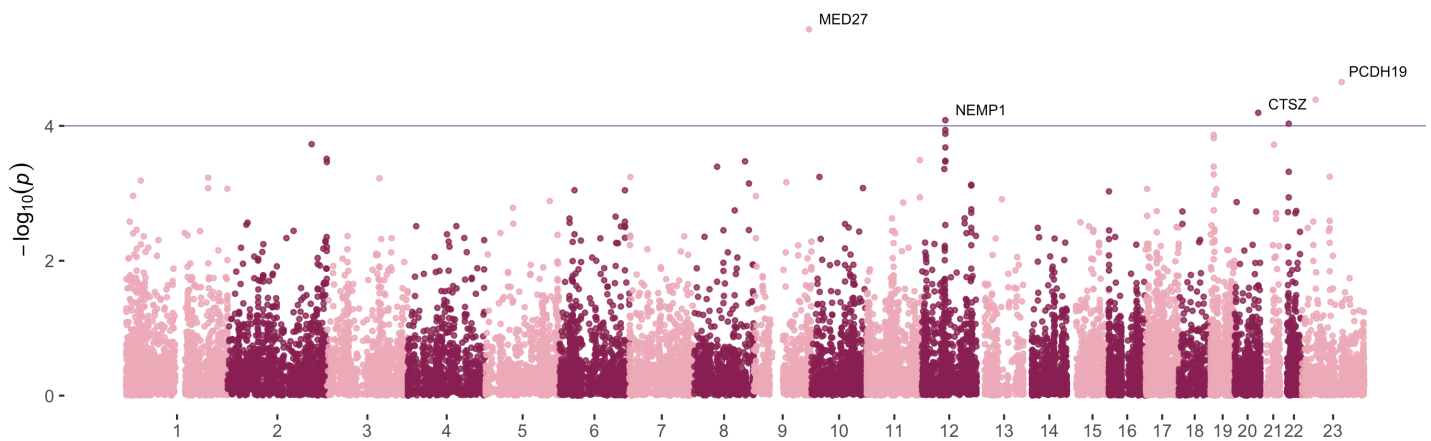

**Supplementary Figure 2.4** Manhattan plot showing the  $-\log_{10} p$ -values for the MAGMA gene analysis (based on the GWEIS SNP-environment interaction results). Suggestively significant genes ( $p < 1e-4$ ) have been annotated.

# Social Activities

## GWEIS

### Manhattan Plot

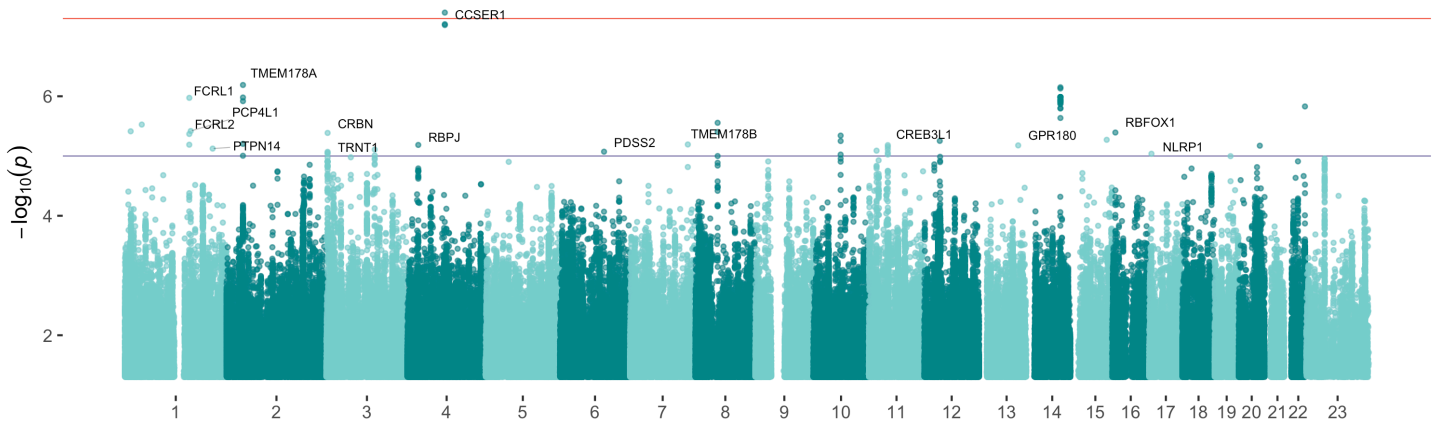

**Supplementary Figure 3.1** Manhattan plot showing the  $-\log_{10}$  SNP-environment interaction  $p$ -values from the GWEIS. Gene labels have been annotated to suggestively significant ( $p < 1e-5$ ) intragenic SNPs with the lowest  $p$ -value. (Only SNPs with  $p < .05$  were plotted).

### Locus Plot (rs111497581)

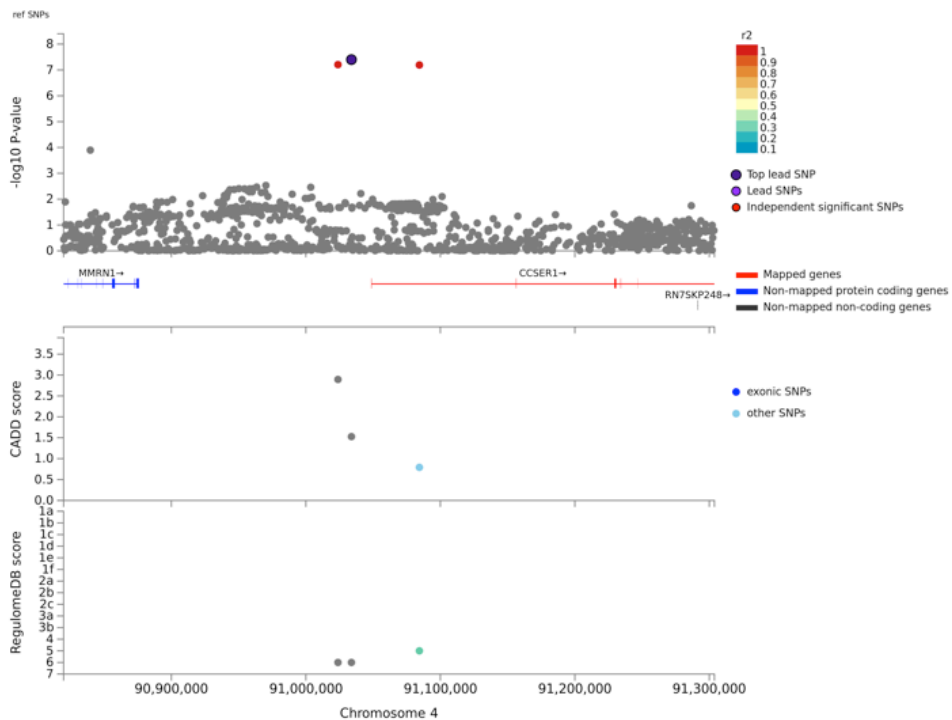

**Supplementary Figure 3.2** Annotated locus plot showing the CADD and RegulomeDB scores for the SNP that reached standard genome-wide significance ( $p < 5e-8$ ).

## Interaction Plots (rs111497581)

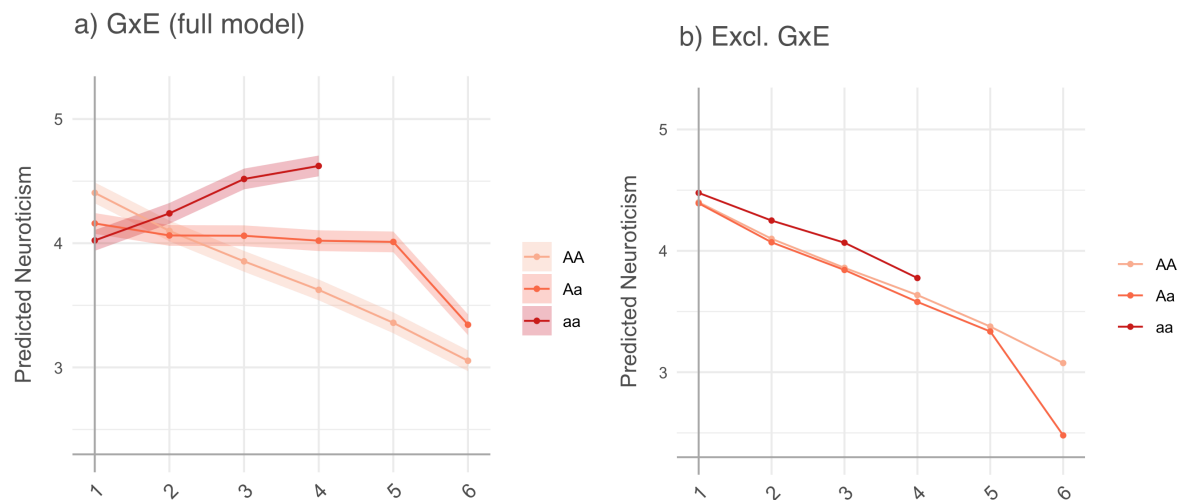

**Supplementary Figure 3.3** Average predicted neuroticism based on a) the full model (i.e., all main and interaction effects), with 95% confidence intervals for the GxE term, or b) everything except the SNP-environment interaction of interest (incl. all main effects and covariate interaction effects). Plot b will show any potential interaction effect captured by the covariates.

## Gene Analysis

### Manhattan Plot

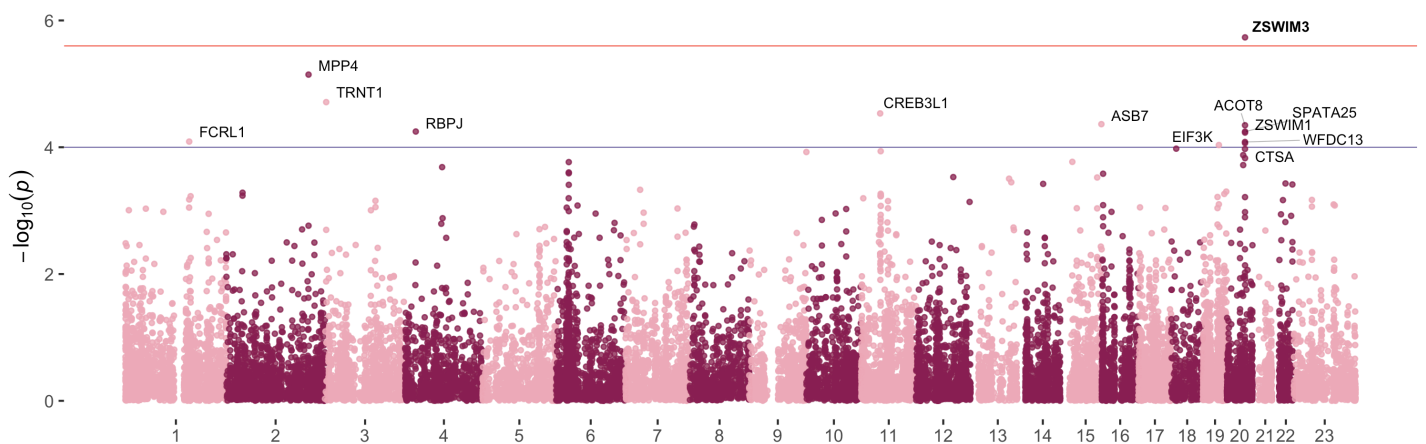

**Supplementary Figure 3.4** Manhattan plot showing the  $-\log_{10} p$ -values for the MAGMA gene analysis (based on the GWEIS SNP-environment interaction results). Suggestively significant genes ( $p < 1e-4$ ) have been annotated.



# Felt Hated by Family Member as a Child

## GWEIS

### Manhattan Plot

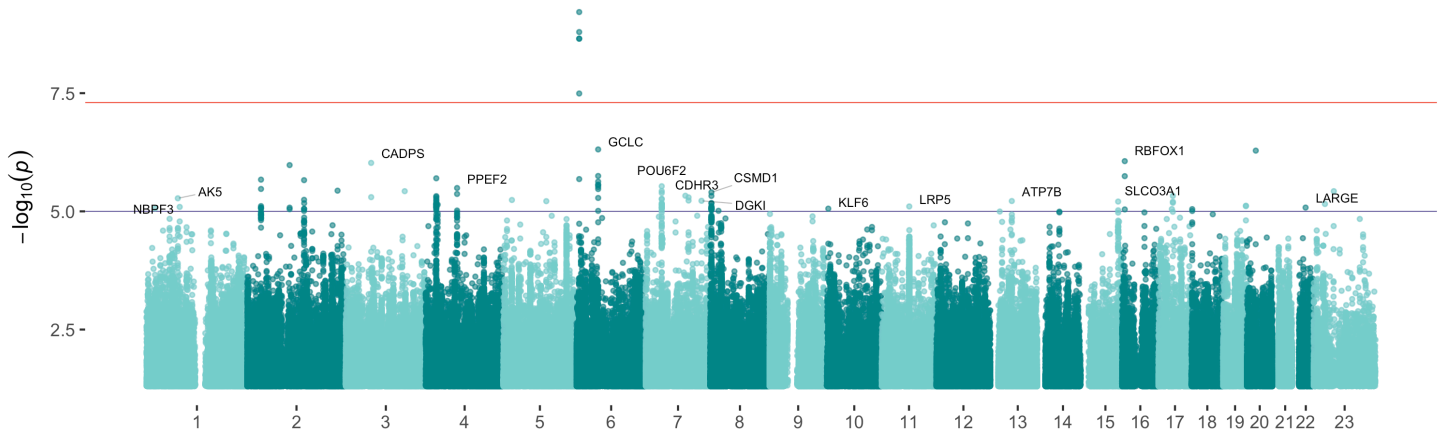

**Supplementary Figure 4.1** Manhattan plot showing the  $-\log_{10}$  SNP-environment interaction  $p$ -values from the GWEIS. Gene labels have been annotated to suggestively significant ( $p < 1e-5$ ) intragenic SNPs with the lowest  $p$ -value. (Only SNPs with  $p < .05$  were plotted).

### Locus Plot (rs115385310)

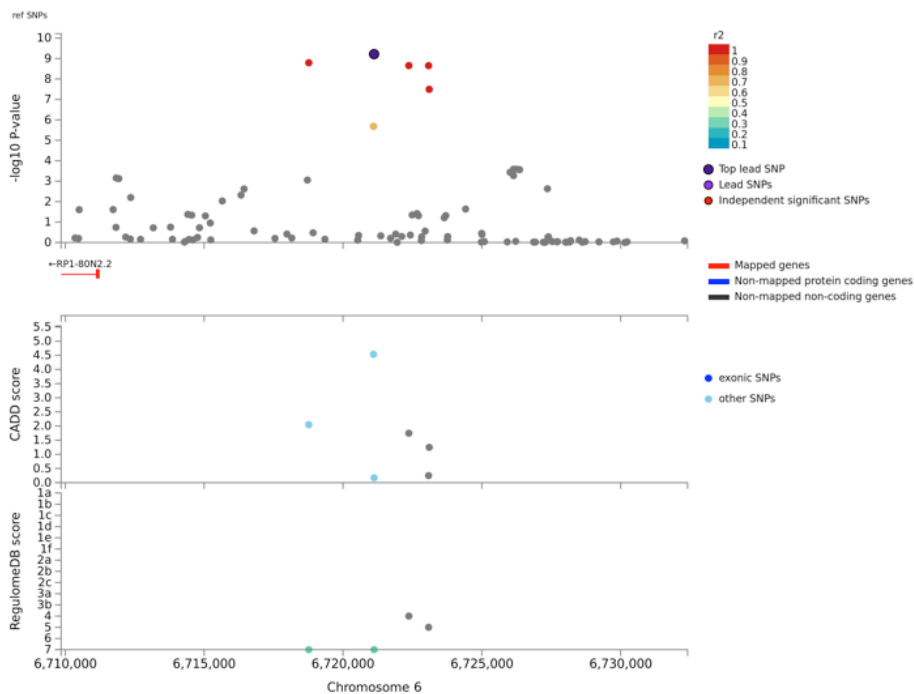

**Supplementary Figure 4.2** Annotated locus plot showing the CADD and RegulomeDB scores for the SNP that reached standard genome-wide significance ( $p < 5e-8$ ).

## Interaction Plots (rs115385310)

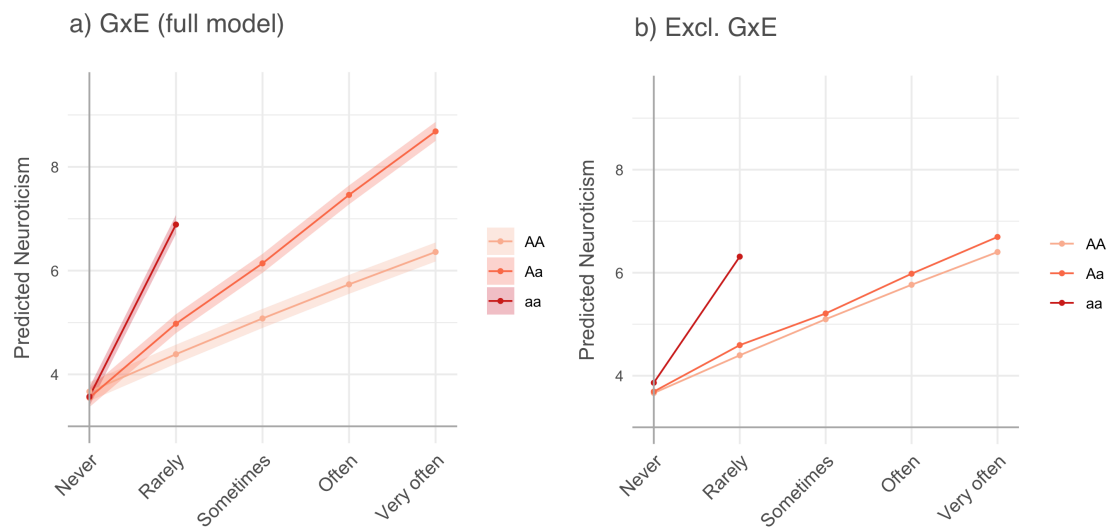

**Supplementary Figure 4.3** Average predicted neuroticism based on a) the full model (i.e., all main and interaction effects), with 95% confidence intervals for the GxE term, or b) everything except the SNP-environment interaction of interest (incl. all main effects and covariate interaction effects). Plot b will show any potential interaction effect captured by the covariates.

## Gene Analysis

### Manhattan Plot

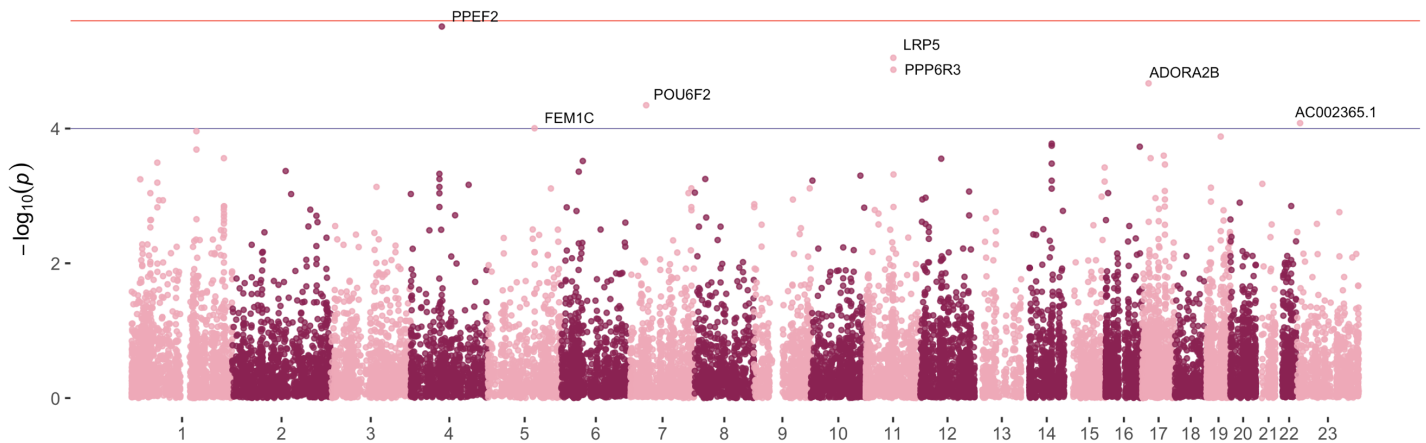

**Supplementary Figure 4.4** Manhattan plot showing the  $-\log_{10} p$ -values for the MAGMA gene analysis (based on the GWEIS SNP-environment interaction results). Suggestively significant genes ( $p < 1e-4$ ) have been annotated.

# Able to Confide GWEIS Manhattan Plot

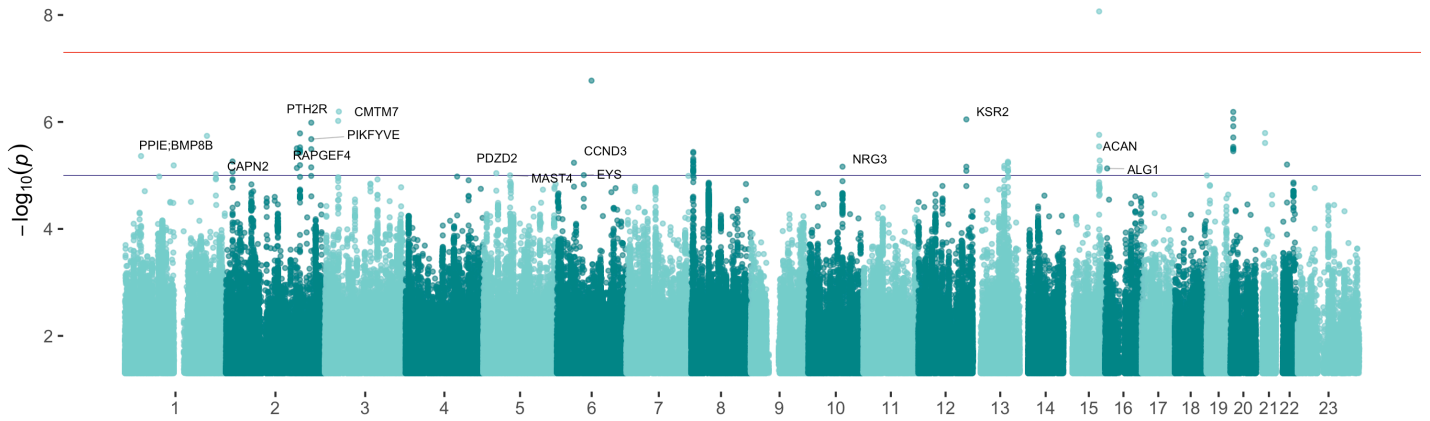

**Supplementary Figure 5.1** Manhattan plot showing the  $-\log_{10}$  SNP-environment interaction  $p$ -values from the GWEIS. Gene labels have been annotated to suggestively significant ( $p < 1e-5$ ) intragenic SNPs with the lowest  $p$ -value. (Only SNPs with  $p < .05$  were plotted).

## Locus Plot (rs874616)

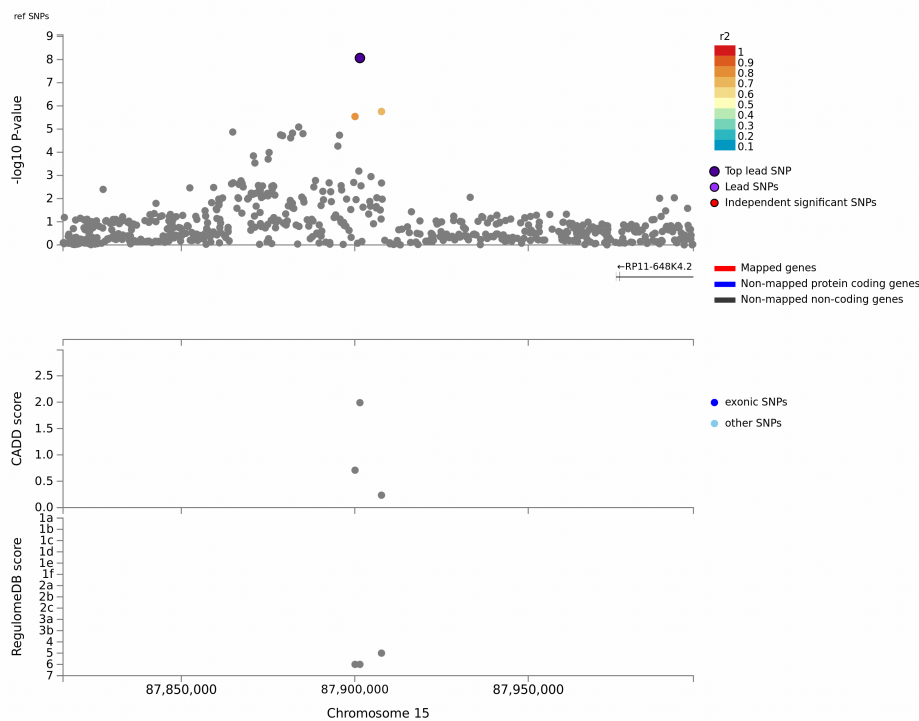

**Supplementary Figure 5.2** Annotated locus plot showing the CADD and RegulomeDB scores for the SNP that reached standard genome-wide significance ( $p < 5e-8$ ).

## Interaction Plots (rs874616)

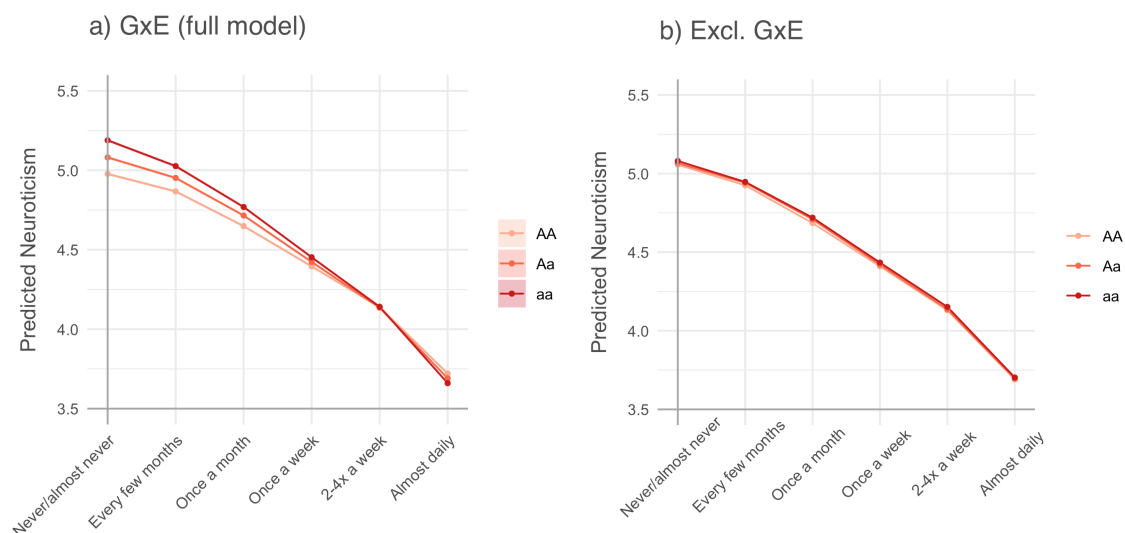

**Supplementary Figure 5.3** Average predicted neuroticism based on a) the full model (i.e., all main and interaction effects), with 95% confidence intervals for the GxE term, or b) everything except the SNP-environment interaction of interest (incl. all main effects and covariate interaction effects). Plot b will show any potential interaction effect captured by the covariates.

## Gene Analysis

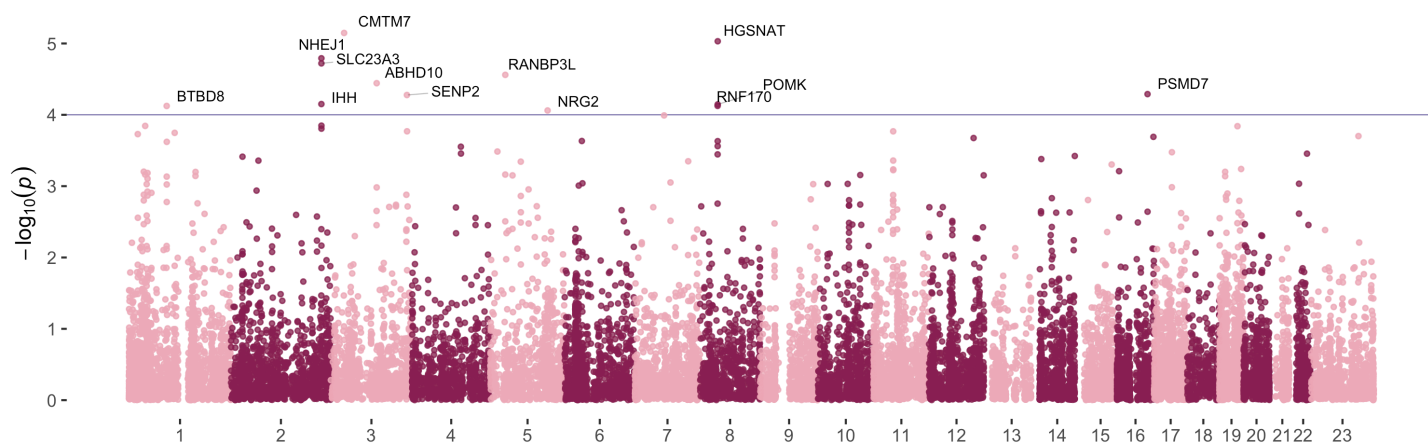

**Supplementary Figure 5.4** Manhattan plot showing the  $-\log_{10}(p)$  values for the MAGMA gene analysis (based on the GWEIS SNP-environment interaction results). Suggestively significant genes ( $p < 1e-4$ ) have been annotated.

# Diagnosed with Life-Threatening Illness

## GWEIS

### Manhattan Plot

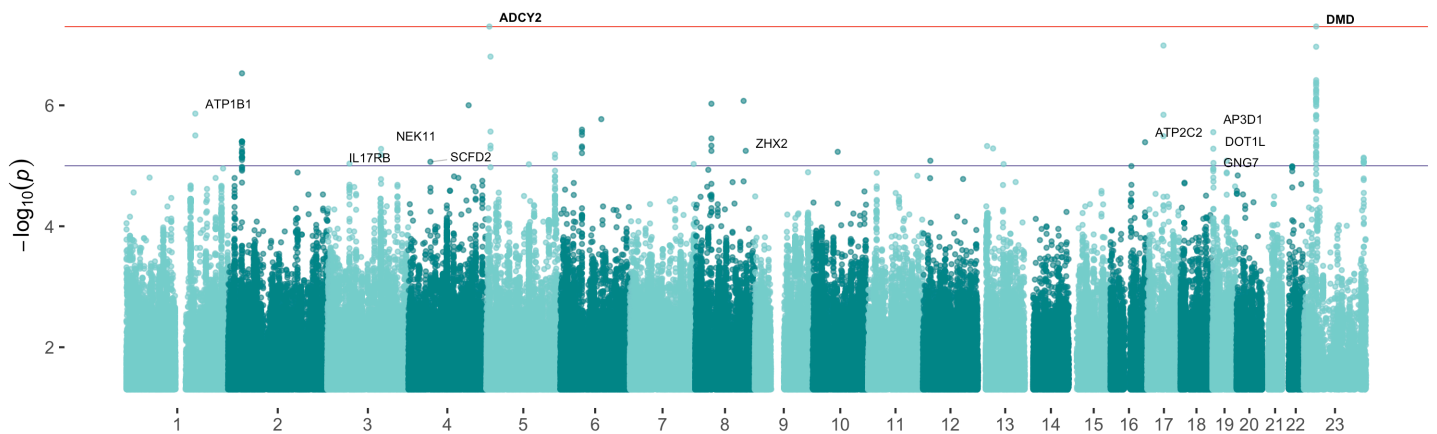

**Supplementary Figure 6.1** Manhattan plot showing the  $-\log_{10}$  SNP-environment interaction  $p$ -values from the GWEIS. Gene labels have been annotated to suggestively significant ( $p < 1e-5$ ) intragenic SNPs with the lowest  $p$ -value. (Only SNPs with  $p < .05$  were plotted).

### Locus Plots (rs185839186, ADCY2)

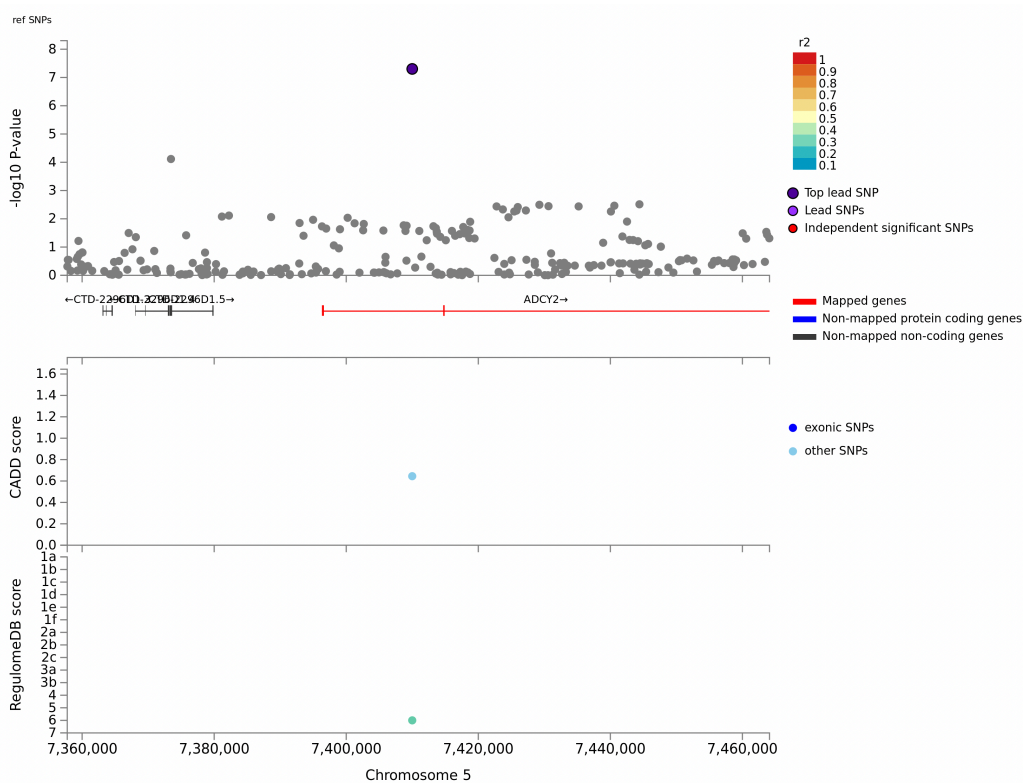

**Supplementary Figure 6.2** Annotated locus plot showing the CADD and RegulomeDB scores for one of the SNPs that reached standard genome-wide significance ( $p < 5e-8$ ).

## Interaction Plots (rs185839186, ADCY2)

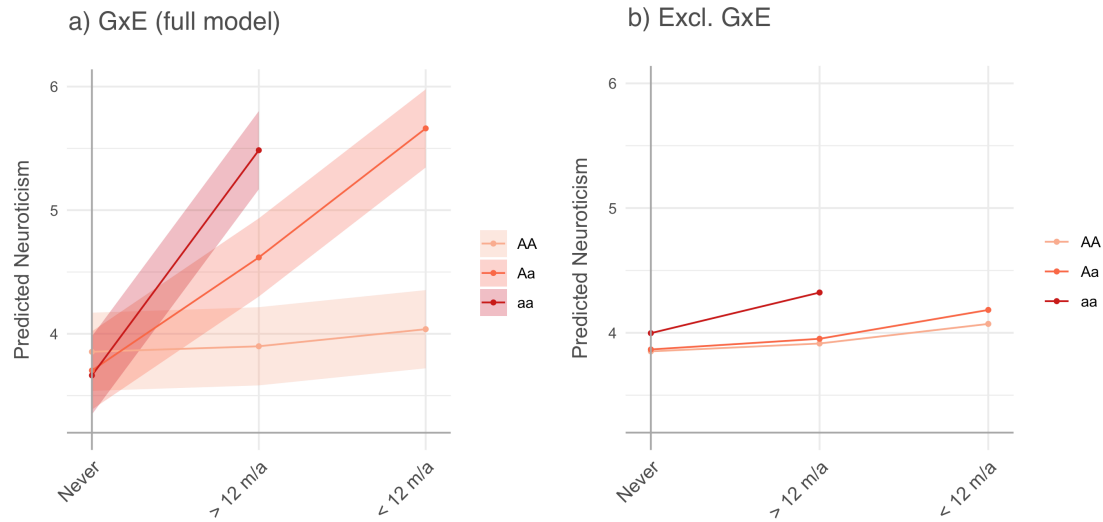

**Supplementary Figure 6.3** Average predicted neuroticism based on a) the full model (i.e., all main and interaction effects), with 95% confidence intervals for the GxE term, or b) everything except the SNP-environment interaction of interest (incl. all main effects and covariate interaction effects). Plot b will show any potential interaction effect captured by the covariates.

## Locus Plot (rs5928040, DMD)

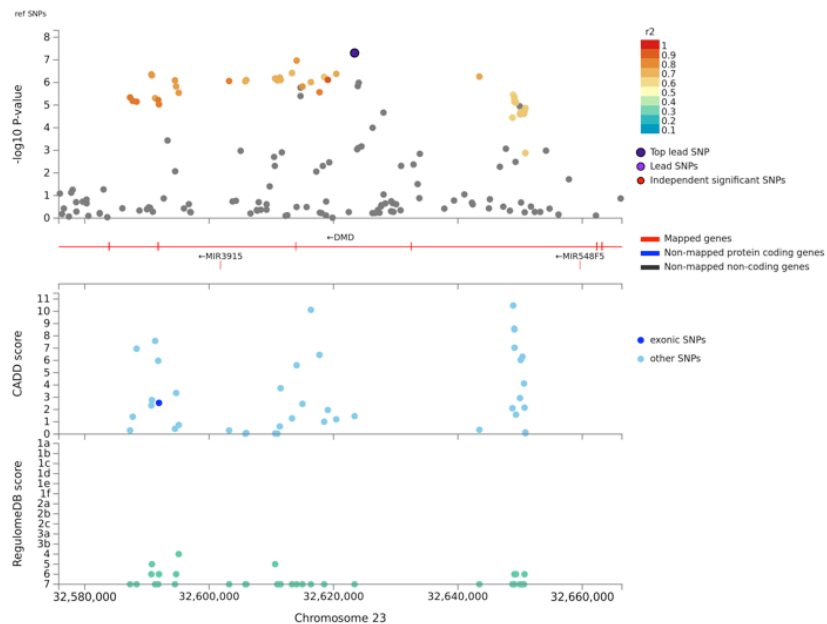

**Supplementary Figure 6.4** Annotated locus plot showing the CADD and RegulomeDB scores for one of the SNPs that reached standard genome-wide significance ( $p < 5e-8$ ).

## Interaction Plot (rs5928040, DMD)

### Females

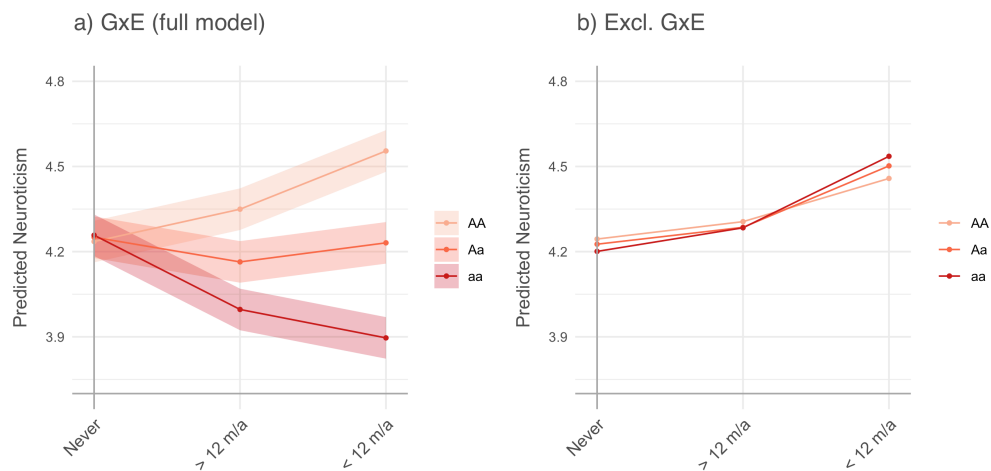

**Supplementary Figure 6.5** Average predicted neuroticism based on a) the full model (i.e., all main and interaction effects), with 95% confidence intervals for the GxE term, or b) everything except the SNP-environment interaction of interest (incl. all main effects and covariate interaction effects). Plot b will show any potential interaction effect captured by the covariates. (NOTE: Males and females were analysed together, but to do differences in the number alleles they were plotted separately).

### Males

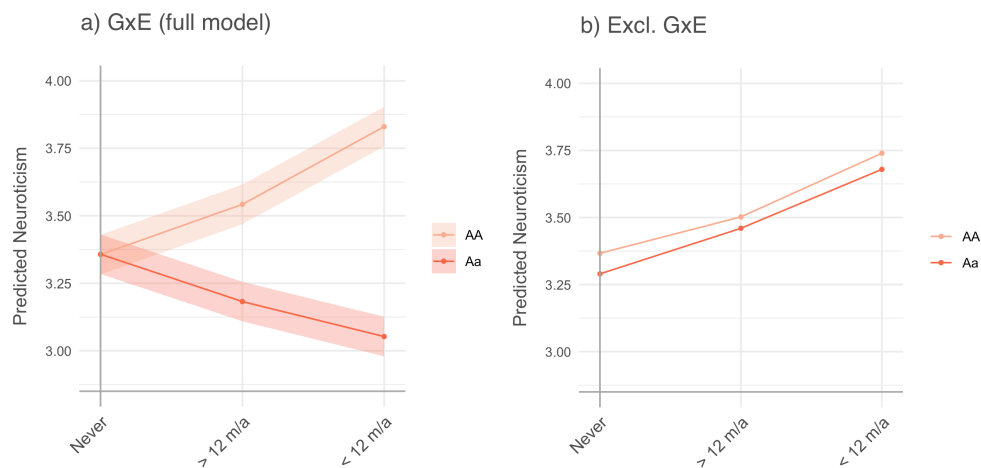

**Supplementary Figure 6.6** Average predicted neuroticism based on a) the full model (i.e., all main and interaction effects), with 95% confidence intervals for the GxE term, or b) everything except the SNP-environment interaction of interest (incl. all main effects and covariate interaction effects). Plot b will show any potential interaction effect captured by the covariates. (NOTE: Males and females were analysed together, but to do differences in the number alleles they were plotted separately).

## Gene Analysis

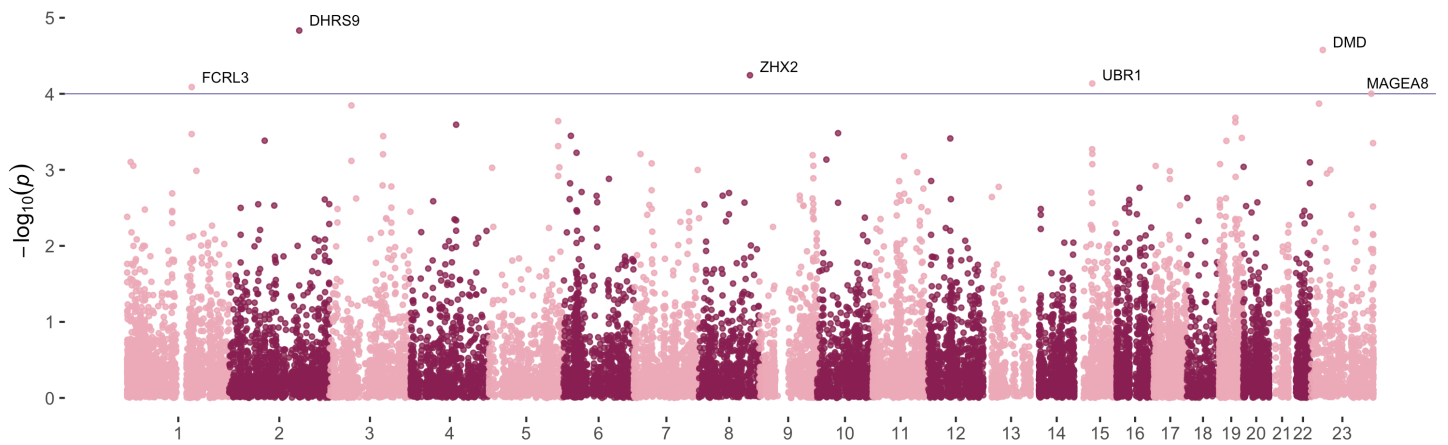

**Supplementary Figure 6.7** Manhattan plot showing the  $-\log_{10}$  p-values for the MAGMA gene analysis (based on the GWEIS SNP-environment interaction results). Suggestively significant genes ( $p < 1e-4$ ) have been annotated.



# Been in a Confiding Relationship as an Adult

## GWEIS

### Manhattan Plot

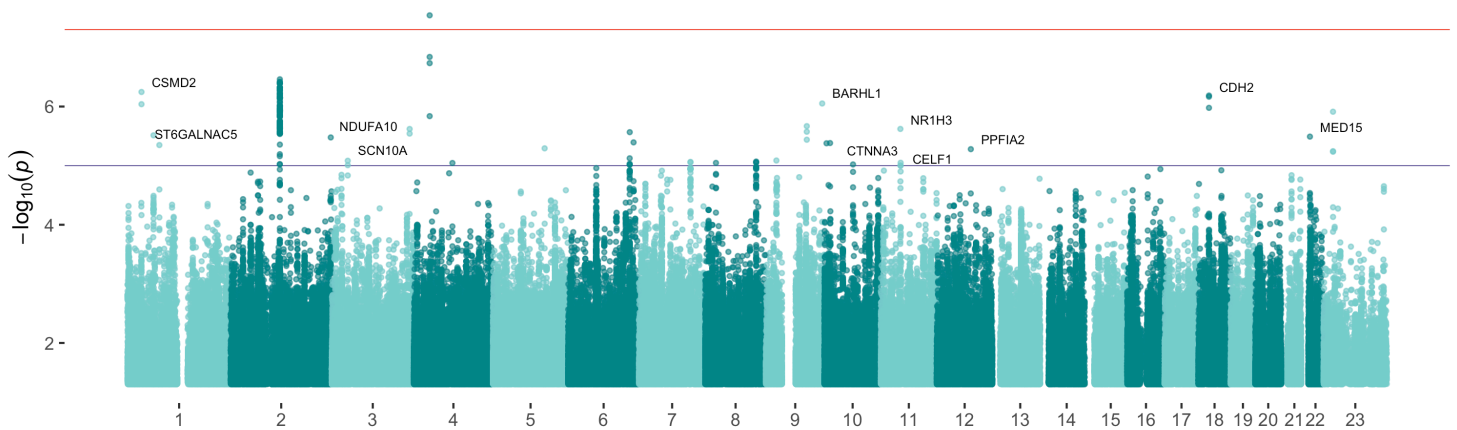

**Supplementary Figure 7.1** Manhattan plot showing the  $-\log_{10}$  SNP-environment interaction  $p$ -values from the GWEIS. Gene labels have been annotated to suggestively significant ( $p < 1e-5$ ) intragenic SNPs with the lowest  $p$ -value. (Only SNPs with  $p < .05$  were plotted).

### Locus Plot

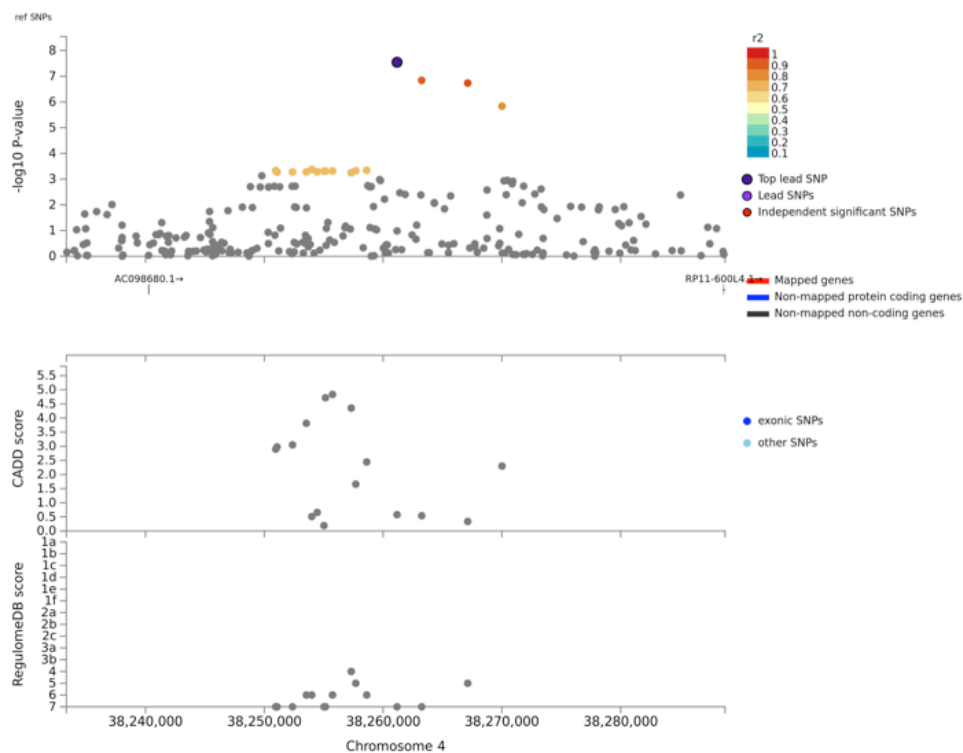

**Supplementary Figure 7.2** Annotated locus plot showing the CADD and RegulomeDB scores for the SNP that reached standard genome-wide significance ( $p < 5e-8$ ).

## Interaction Plots

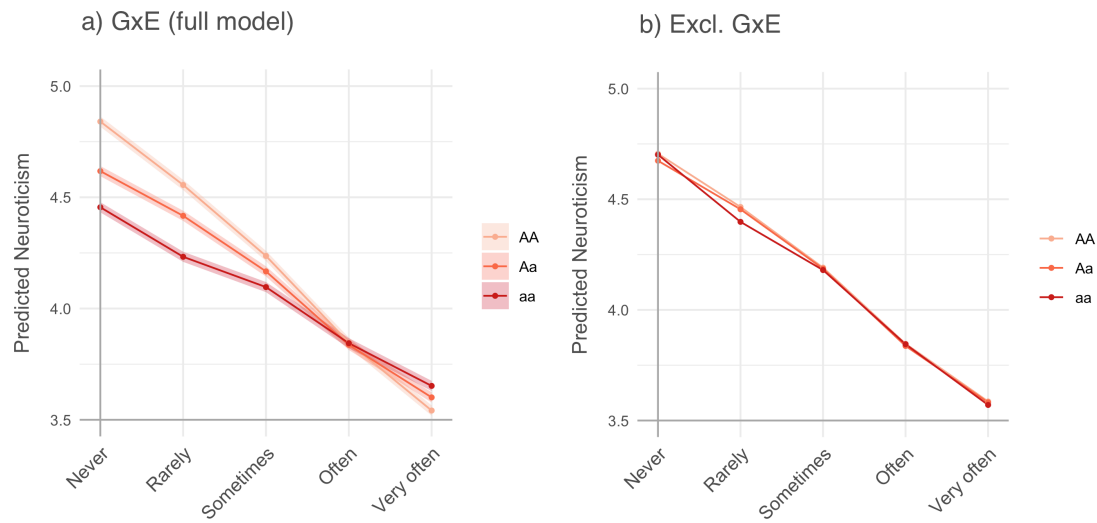

**Supplementary Figure 7.3** Average predicted neuroticism based on a) the full model (i.e., all main and interaction effects), with 95% confidence intervals for the GxE term, or b) everything except the SNP-environment interaction of interest (incl. all main effects and covariate interaction effects). Plot b will show any potential interaction effect captured by the covariates.

## Gene Analysis

### Manhattan Plot

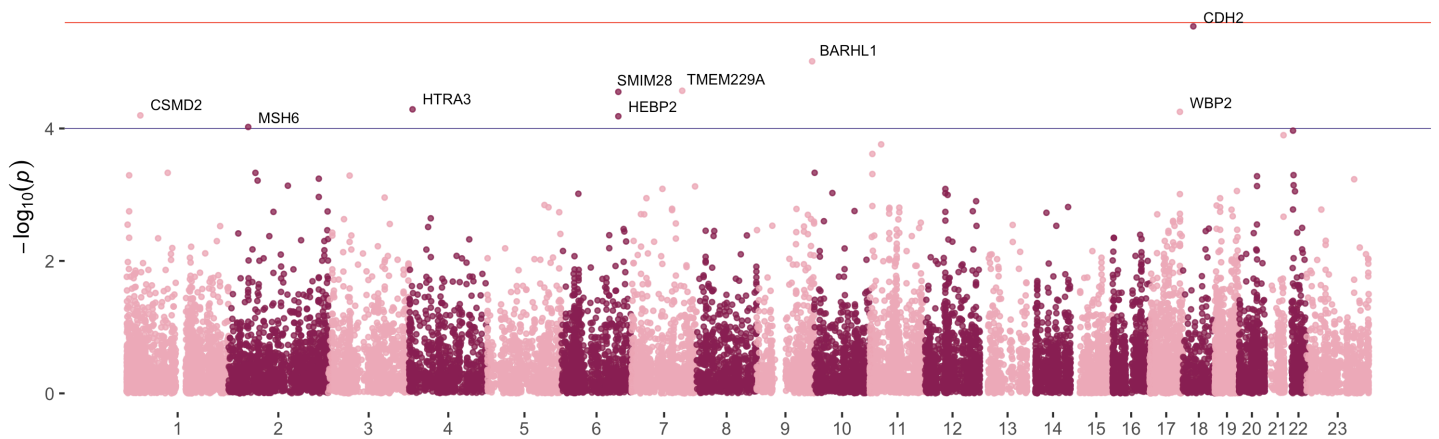

**Supplementary Figure 7.4** Manhattan plot showing the  $-\log_{10} p$ -values for the MAGMA gene analysis (based on the GWEIS SNP-environment interaction results). Suggestively significant genes ( $p < 1e-4$ ) have been annotated.

# Alcohol Intake Frequency

## GWEIS

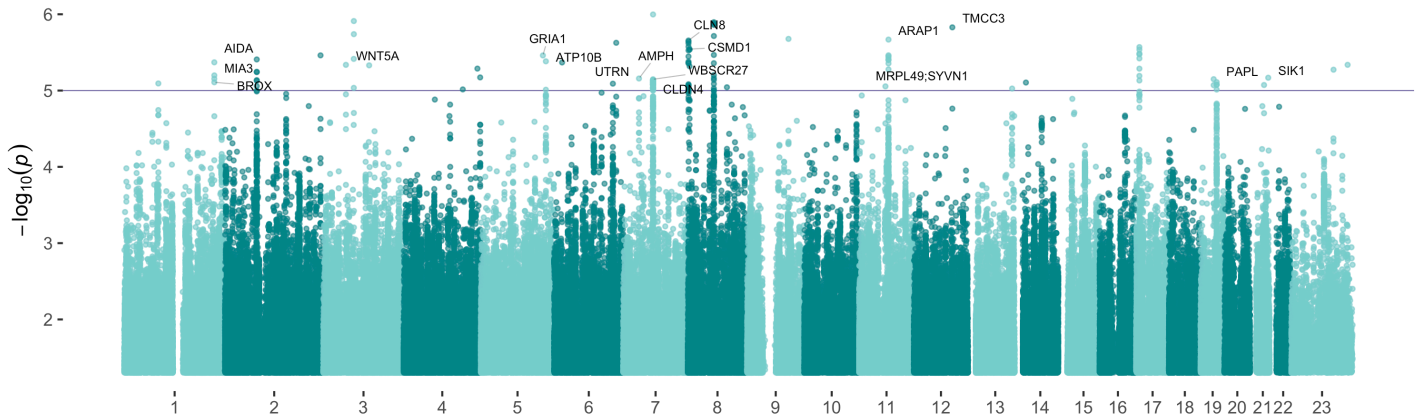

**Supplementary Figure 8.1** Manhattan plot showing the  $-\log_{10}$  SNP-environment interaction  $p$ -values from the GWEIS. Gene labels have been annotated to suggestively significant ( $p < 1e-5$ ) intragenic SNPs with the lowest  $p$ -value. (Only SNPs with  $p < .05$  were plotted).

## Gene Analysis

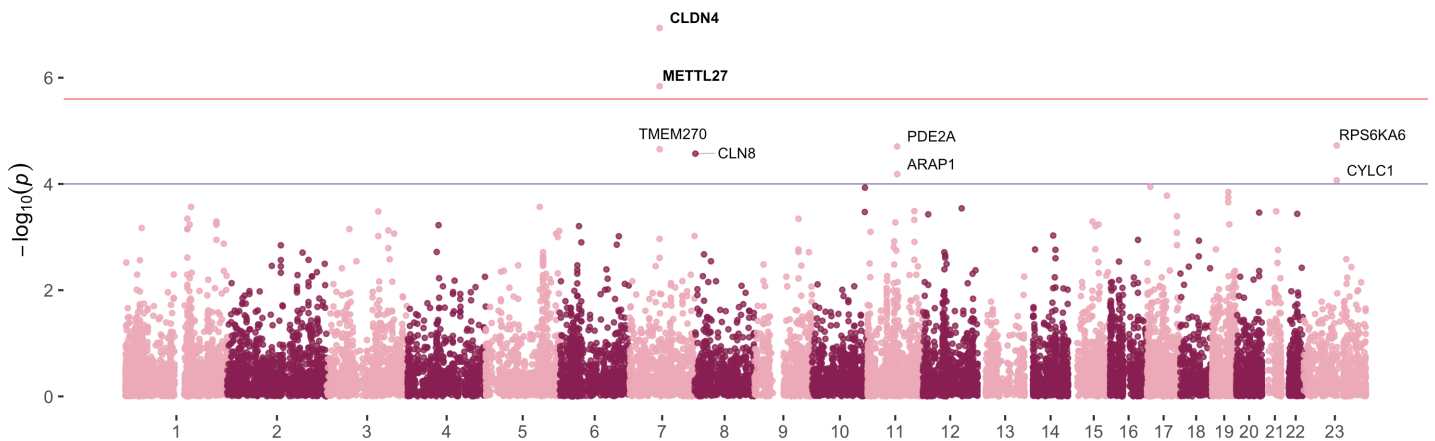

**Supplementary Figure 8.2** Manhattan plot showing the  $-\log_{10}$   $p$ -values for the MAGMA gene analysis (based on the GWEIS SNP-environment interaction results). Suggestively significant genes ( $p < 1e-4$ ) have been annotated.

# Victim of Sexual Assault

## GWEIS

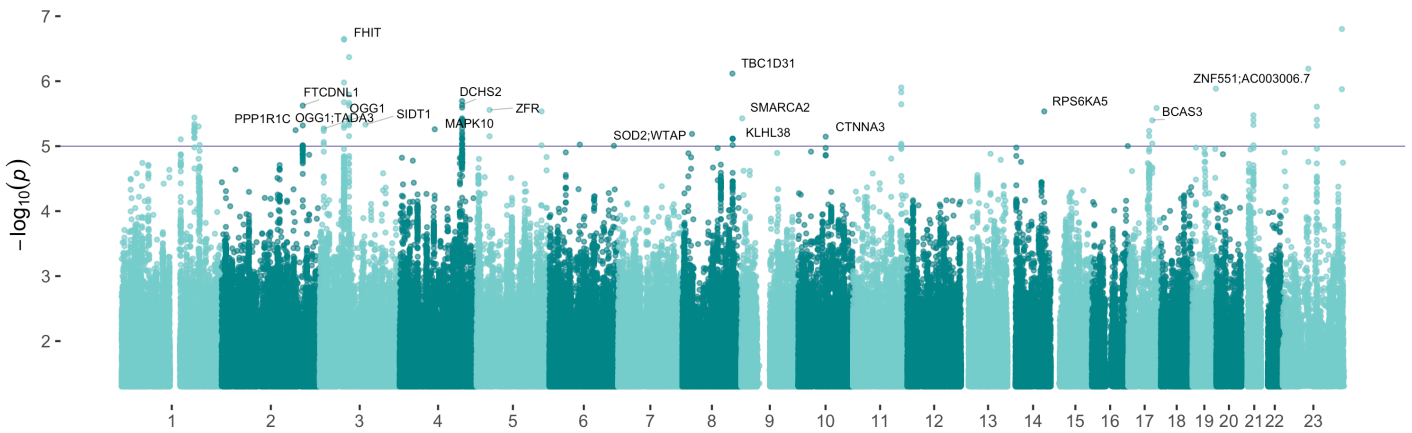

**Supplementary Figure 9.1** Manhattan plot showing the  $-\log_{10}$  SNP-environment interaction  $p$ -values from the GWEIS. Gene labels have been annotated to suggestively significant ( $p < 1e-5$ ) intragenic SNPs with the lowest  $p$ -value. (Only SNPs with  $p < .05$  were plotted).

## Gene Analysis

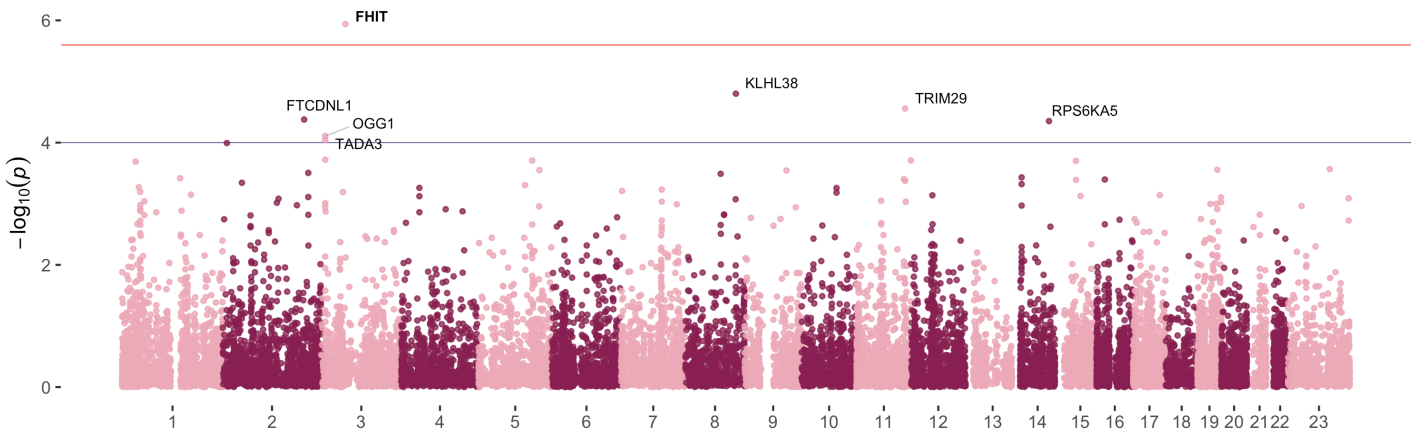

**Supplementary Figure 9.2** Manhattan plot showing the  $-\log_{10}$   $p$ -values for the MAGMA gene analysis (based on the GWEIS SNP-environment interaction results). Suggestively significant genes ( $p < 1e-4$ ) have been annotated.

# Chronic Pain

## GWEIS

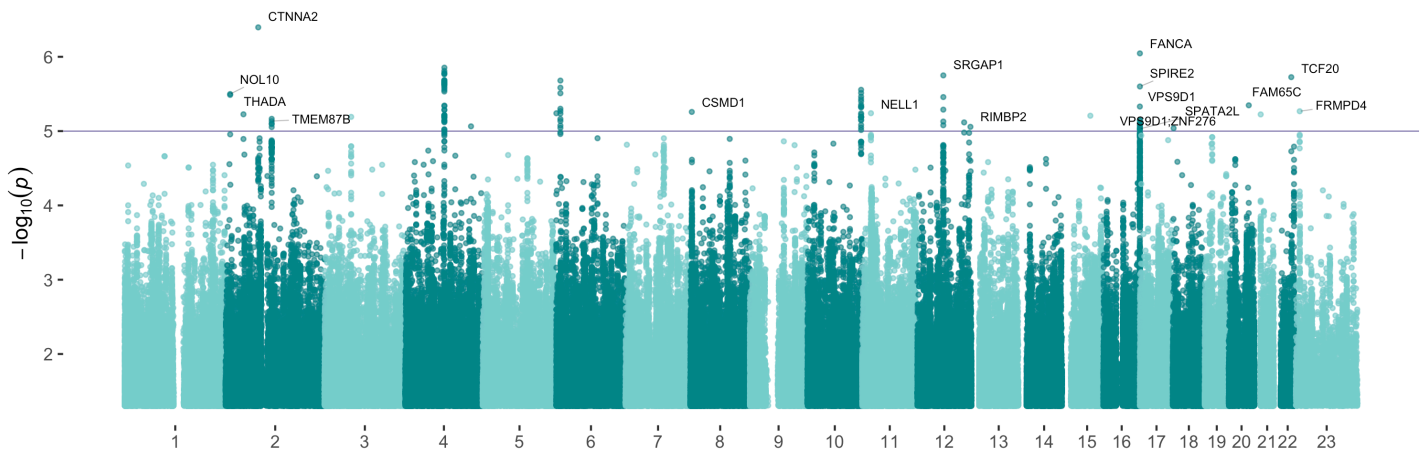

**Supplementary Figure 10.1** Manhattan plot showing the  $-\log_{10}$  SNP-environment interaction  $p$ -values from the GWEIS. Gene labels have been annotated to suggestively significant ( $p < 1e-5$ ) intragenic SNPs with the lowest  $p$ -value. (Only SNPs with  $p < .05$  were plotted).

## Gene Analysis

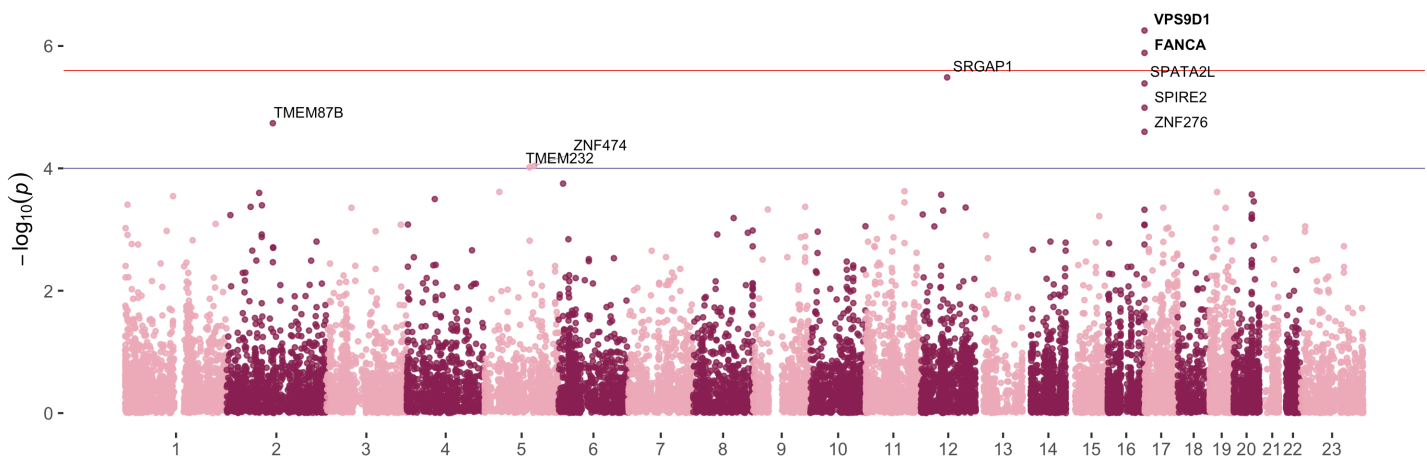

**Supplementary Figure 10.2** Manhattan plot showing the  $-\log_{10}$   $p$ -values for the MAGMA gene analysis (based on the GWEIS SNP-environment interaction results). Suggestively significant genes ( $p < 1e-4$ ) have been annotated.

# Age Completed Full-Time Education GWEIS

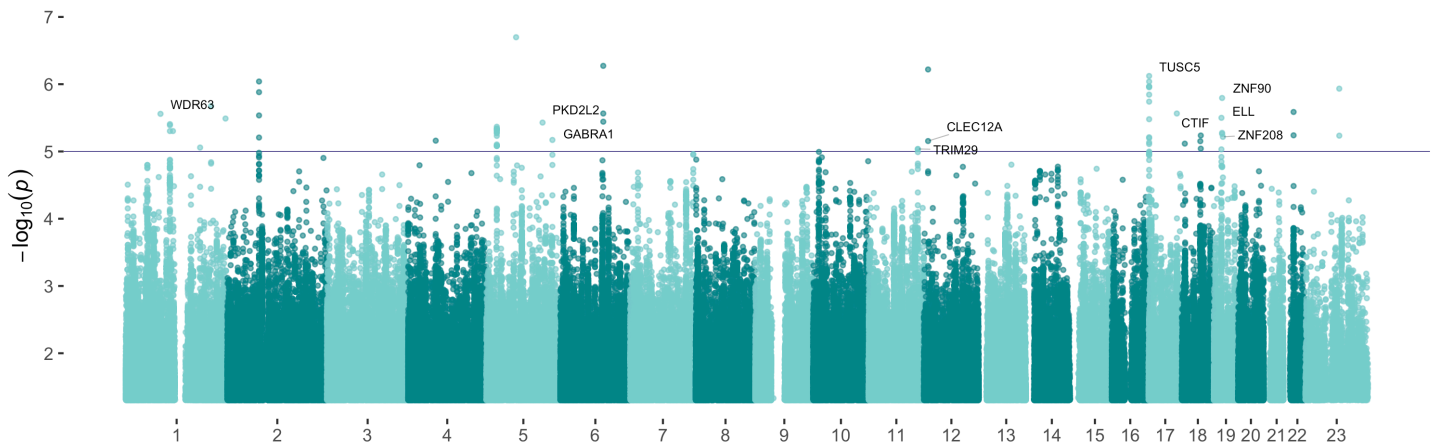

**Supplementary Figure 11.1:** Manhattan plot showing the  $-\log_{10}$  SNP-environment interaction  $p$ -values from the GWEIS. Gene labels have been annotated to suggestively significant ( $p < 1e-5$ ) intragenic SNPs with the lowest  $p$ -value. (Only SNPs with  $p < .05$  were plotted).

## Gene Analysis

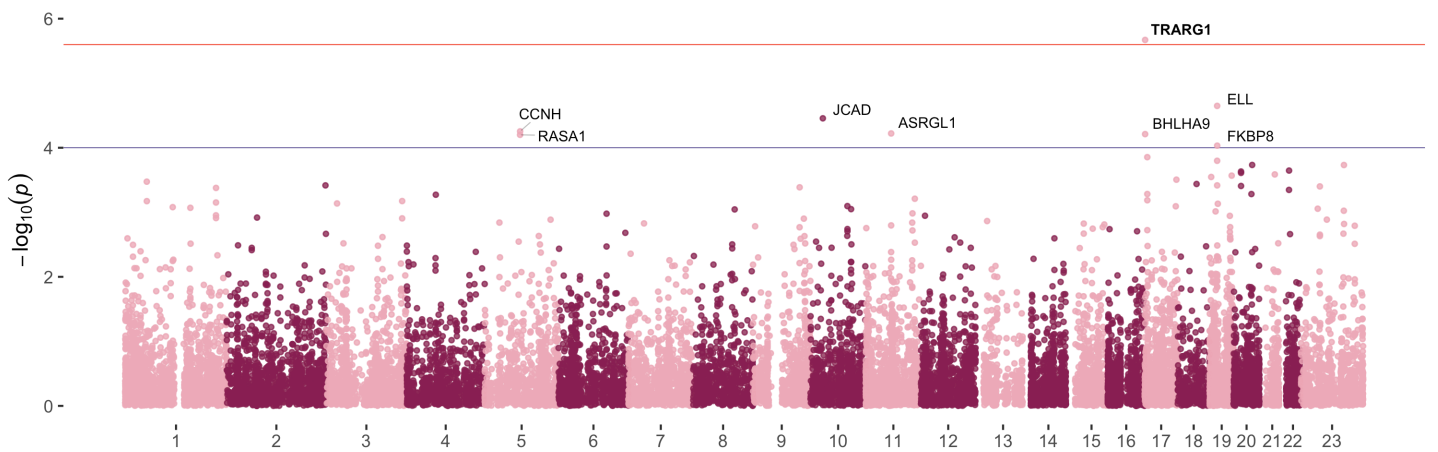

**Supplementary Figure 11.2** Manhattan plot showing the  $-\log_{10}$   $p$ -values for the MAGMA gene analysis (based on the GWEIS SNP-environment interaction results). Suggestively significant genes ( $p < 1e-4$ ) have been annotated.

# Family Relationship Satisfaction

## GWEIS

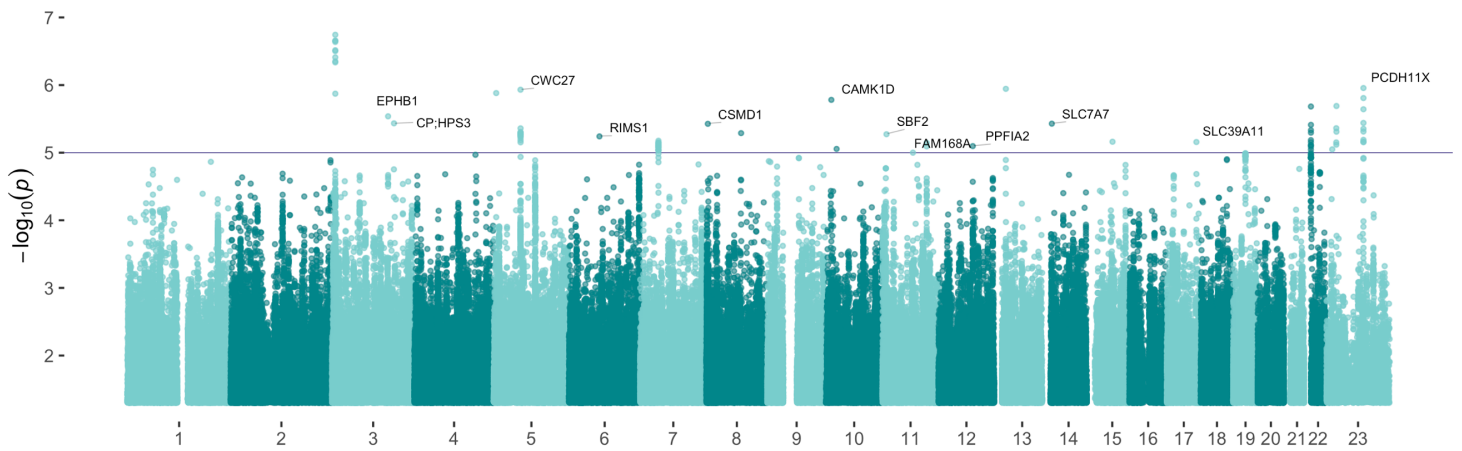

**Supplementary Figure 12.1** Manhattan plot showing the  $-\log_{10}$  SNP-environment interaction p-values from the GWEIS. Gene labels have been annotated to suggestively significant ( $p < 1e-5$ ) intragenic SNPs with the lowest p-value. (Only SNPs with  $p < .05$  were plotted).

## Gene Analysis

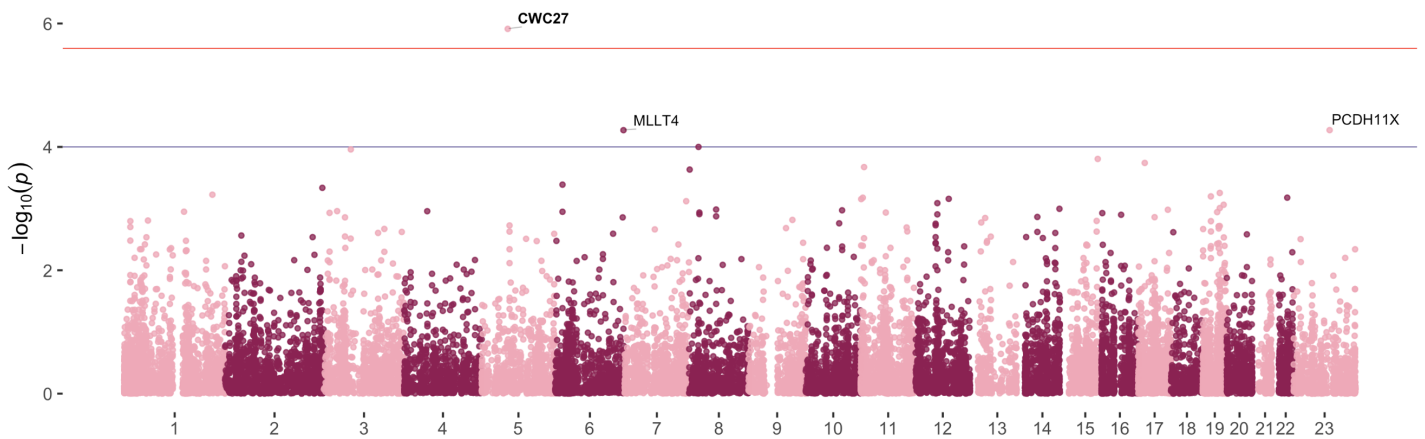

**Supplementary Figure 12.2** Manhattan plot showing the  $-\log_{10}$  p-values for the MAGMA gene analysis (based on the GWEIS SNP-environment interaction results). Suggestively significant genes ( $p < 1e-4$ ) have been annotated.

# Fluid Intelligence Score

## GWEIS

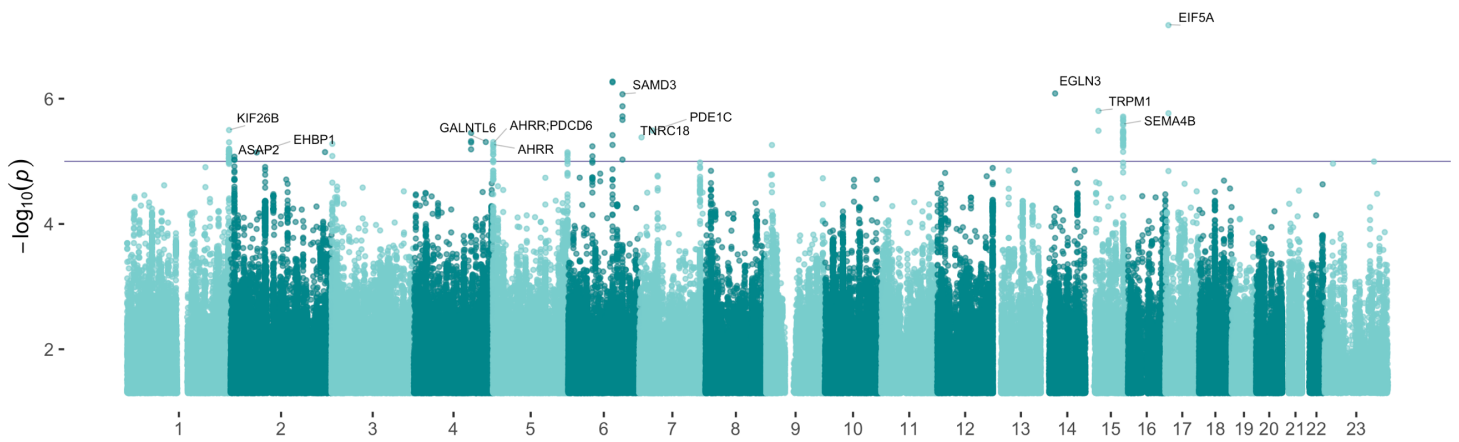

**Supplementary Figure 13.1** Manhattan plot showing the  $-\log_{10}$  SNP-environment interaction  $p$ -values from the GWEIS. Gene labels have been annotated to suggestively significant ( $p < 1e-5$ ) intragenic SNPs with the lowest  $p$ -value. (Only SNPs with  $p < .05$  were plotted).

## Gene Analysis

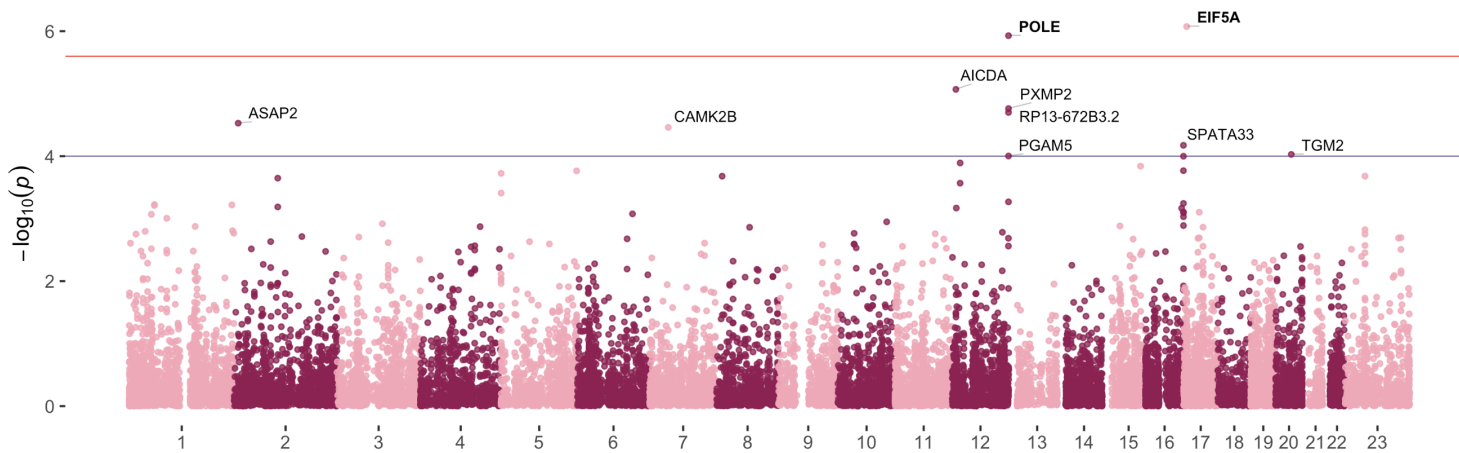

**Supplementary Figure 13.2** Manhattan plot showing the  $-\log_{10}$   $p$ -values for the MAGMA gene analysis (based on the GWEIS SNP-environment interaction results). Suggestively significant genes ( $p < 1e-4$ ) have been annotated.



## Frequency of Friend/Family Visits GWEIS

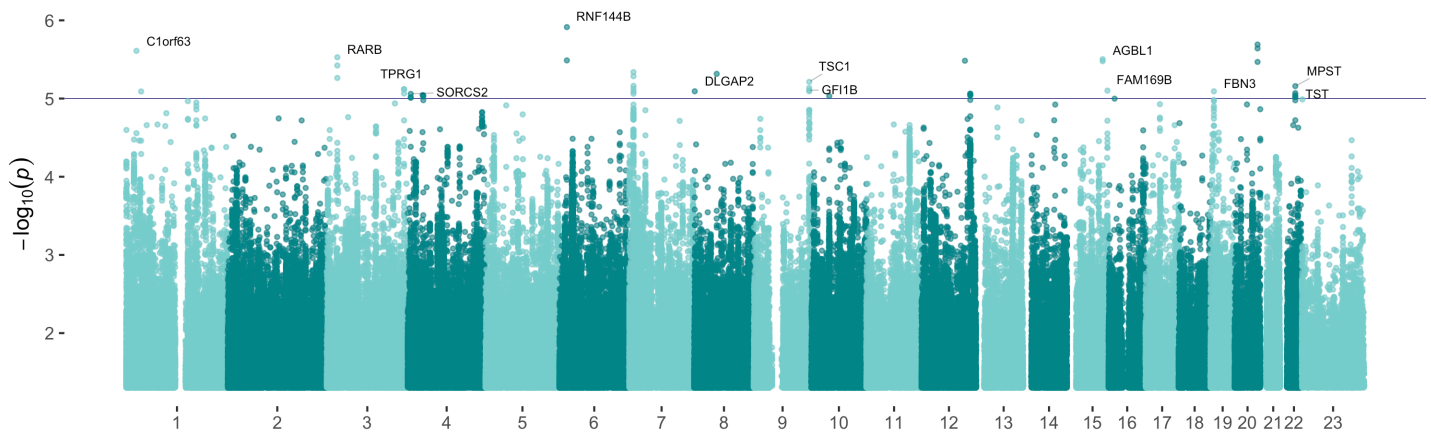

**Supplementary Figure 14.1** Manhattan plot showing the  $-\log_{10}$  SNP-environment interaction  $p$ -values from the GWEIS. Gene labels have been annotated to suggestively significant ( $p < 1e-5$ ) intragenic SNPs with the lowest  $p$ -value. (Only SNPs with  $p < .05$  were plotted).

## Gene Analysis

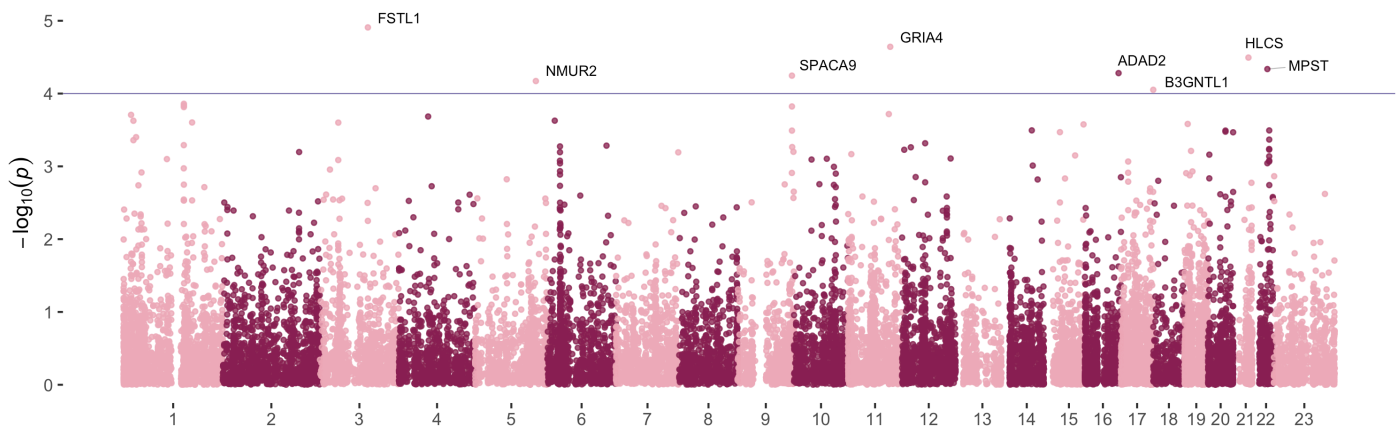

**Supplementary Figure 14.2** Manhattan plot showing the  $-\log_{10}$   $p$ -values for the MAGMA gene analysis (based on the GWEIS SNP-environment interaction results). Suggestively significant genes ( $p < 1e-4$ ) have been annotated.

# Sleeplessness / Insomnia

## GWEIS

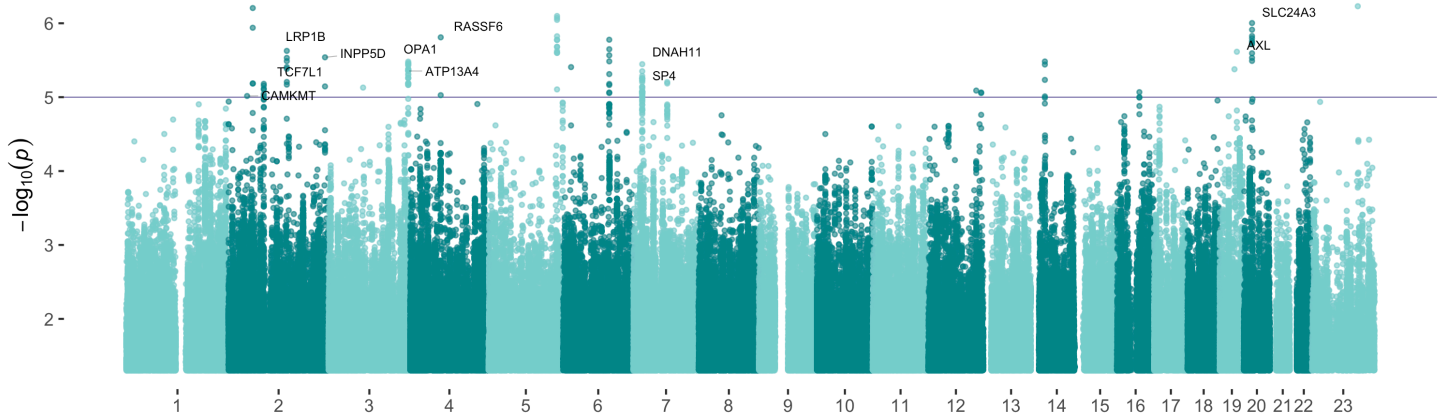

**Supplementary Figure 15.1** Manhattan plot showing the  $-\log_{10}$  SNP-environment interaction p-values from the GWEIS. Gene labels have been annotated to suggestively significant ( $p < 1e-5$ ) intragenic SNPs with the lowest p-value. (Only SNPs with  $p < .05$  were plotted).

## Gene Analysis

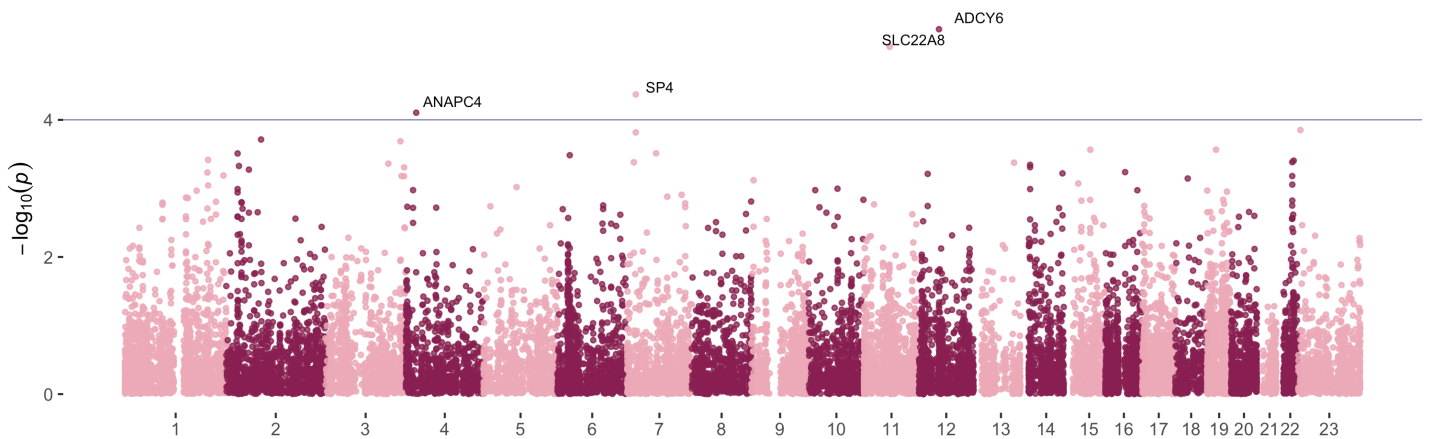

**Supplementary Figure 15.2** Manhattan plot showing the  $-\log_{10}$  p-values for the MAGMA gene analysis (based on the GWEIS SNP-environment interaction results). Suggestively significant genes ( $p < 1e-4$ ) have been annotated.

# Long-Standing Illness, Disability, or Infirmary

## GWEIS

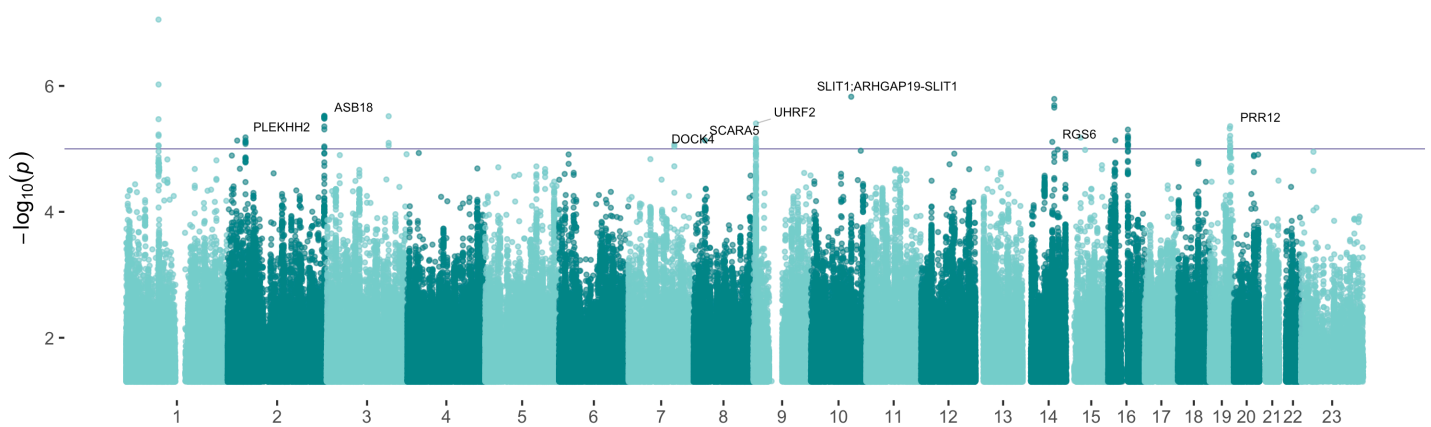

**Supplementary Figure 16.1** Manhattan plot showing the  $-\log_{10}$  SNP-environment interaction p-values from the GWEIS. Gene labels have been annotated to suggestively significant ( $p < 1e-5$ ) intragenic SNPs with the lowest p-value. (Only SNPs with  $p < .05$  were plotted).

## Gene Analysis

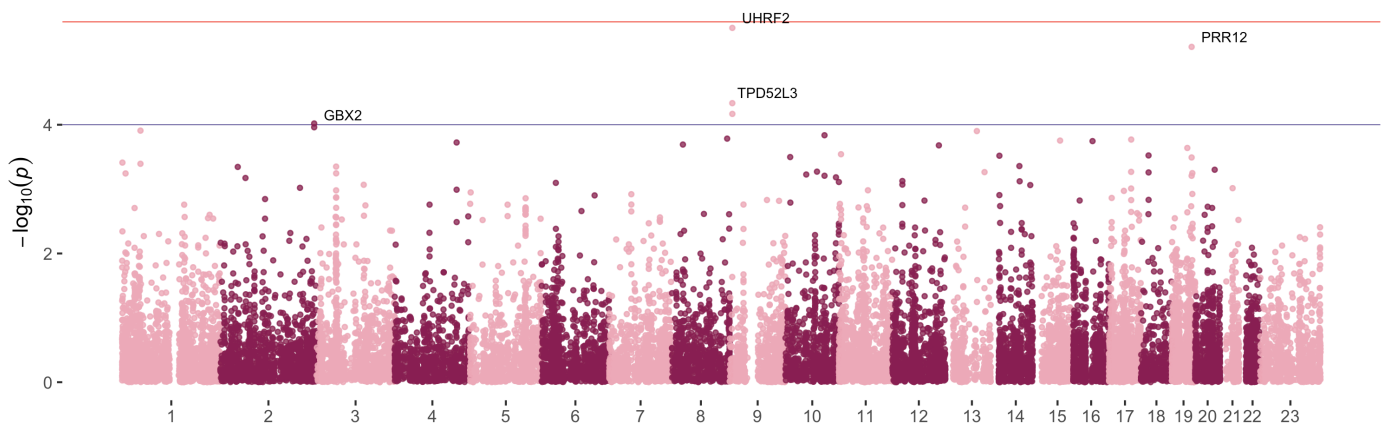

**Supplementary Figure 16.2** Manhattan plot showing the  $-\log_{10}$  p-values for the MAGMA gene analysis (based on the GWEIS SNP-environment interaction results). Suggestively significant genes ( $p < 1e-4$ ) have been annotated.

# Health Satisfaction

## GWEIS

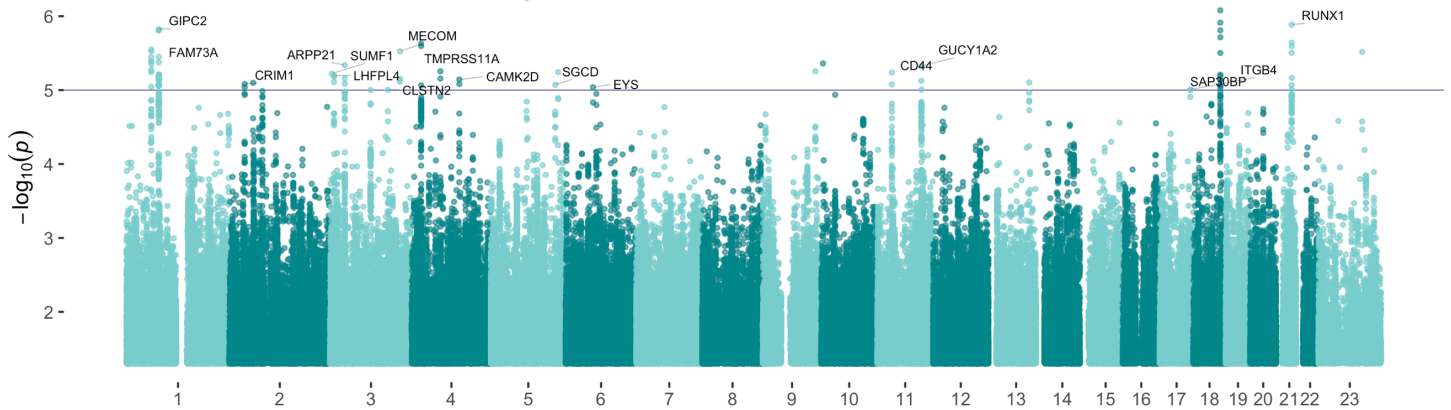

**Supplementary Figure 17.1** Manhattan plot showing the  $-\log_{10}$  SNP-environment interaction  $p$ -values from the GWEIS. Gene labels have been annotated to suggestively significant ( $p < 1e-5$ ) intragenic SNPs with the lowest  $p$ -value. (Only SNPs with  $p < .05$  were plotted).

## Gene Analysis

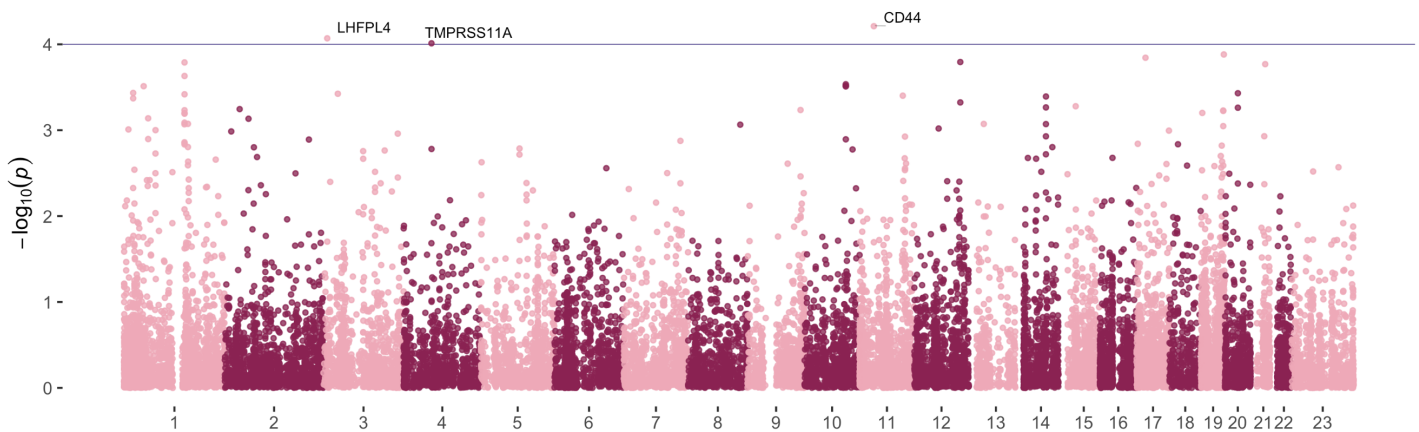

**Supplementary Figure 17.2** Manhattan plot showing the  $-\log_{10}$   $p$ -values for the MAGMA gene analysis (based on the GWEIS SNP-environment interaction results). Suggestively significant genes ( $p < 1e-4$ ) have been annotated.

# Friendships Satisfaction

## GWEIS

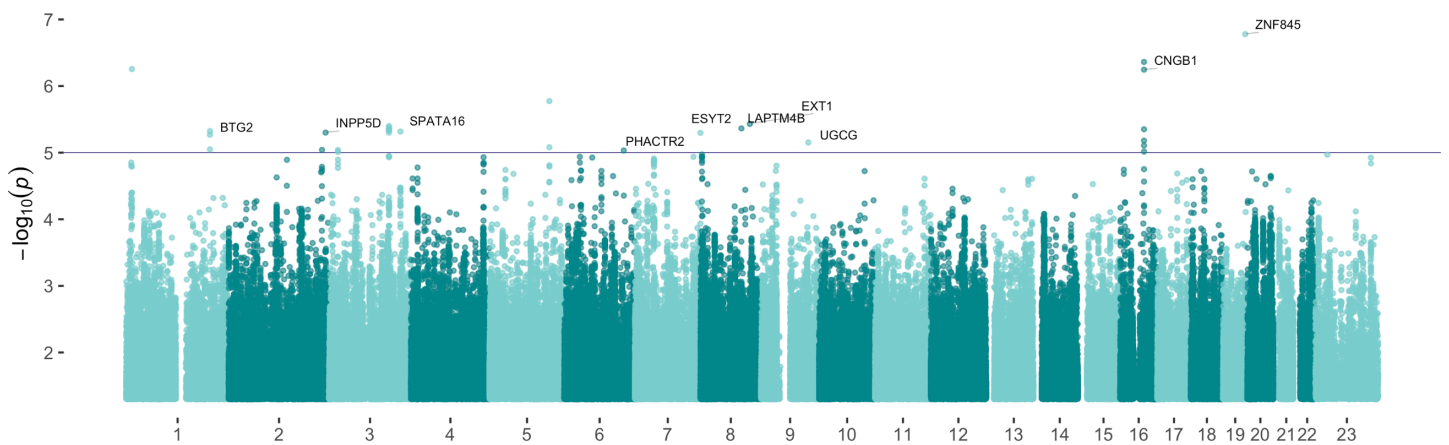

**Supplementary Figure 18.1** Manhattan plot showing the  $-\log_{10}$  SNP-environment interaction  $p$ -values from the GWEIS. Gene labels have been annotated to suggestively significant ( $p < 1e-5$ ) intragenic SNPs with the lowest  $p$ -value. (Only SNPs with  $p < .05$  were plotted).

## Gene Analysis

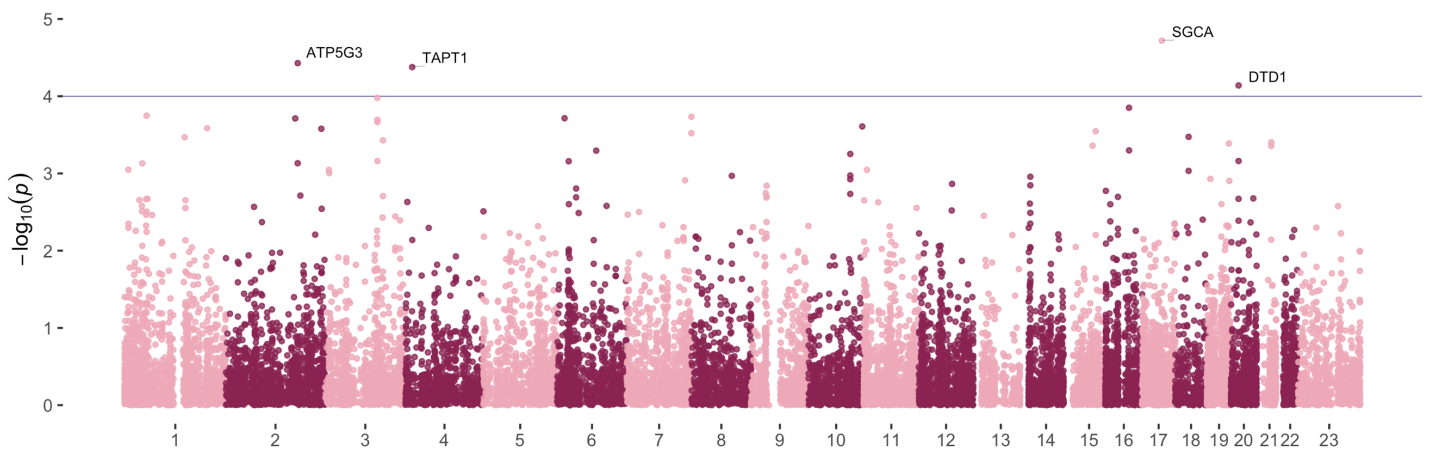

**Supplementary Figure 18.2** Manhattan plot showing the  $-\log_{10}$   $p$ -values for the MAGMA gene analysis (based on the GWEIS SNP-environment interaction results). Suggestively significant genes ( $p < 1e-4$ ) have been annotated.

# Financial Situation Satisfaction

## GWEIS

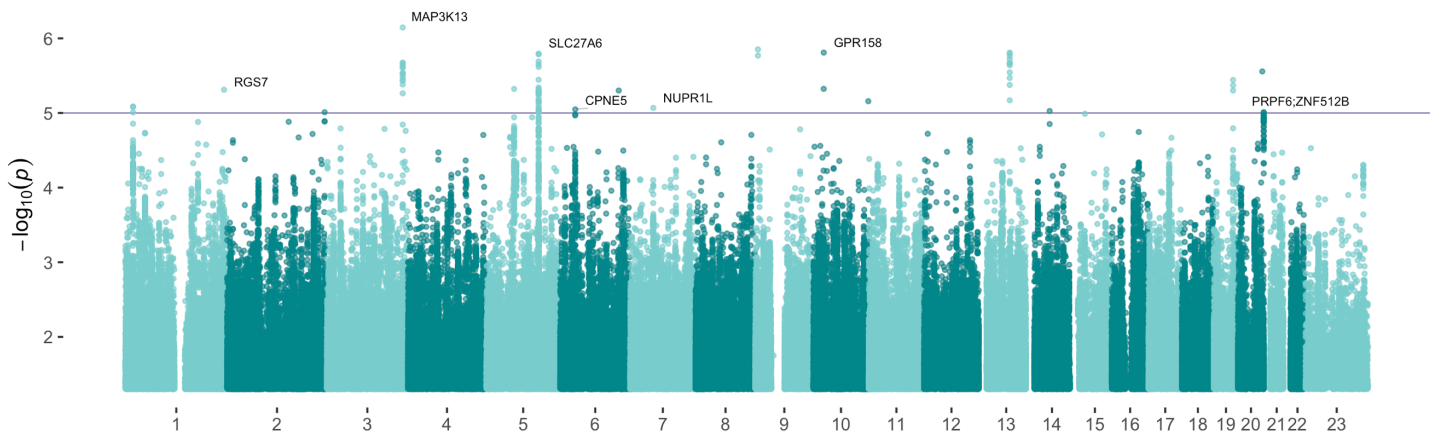

**Supplementary Figure 19.1** Manhattan plot showing the  $-\log_{10}$  SNP-environment interaction p-values from the GWEIS. Gene labels have been annotated to suggestively significant ( $p < 1e-5$ ) intragenic SNPs with the lowest p-value. (Only SNPs with  $p < .05$  were plotted).

## Gene Analysis

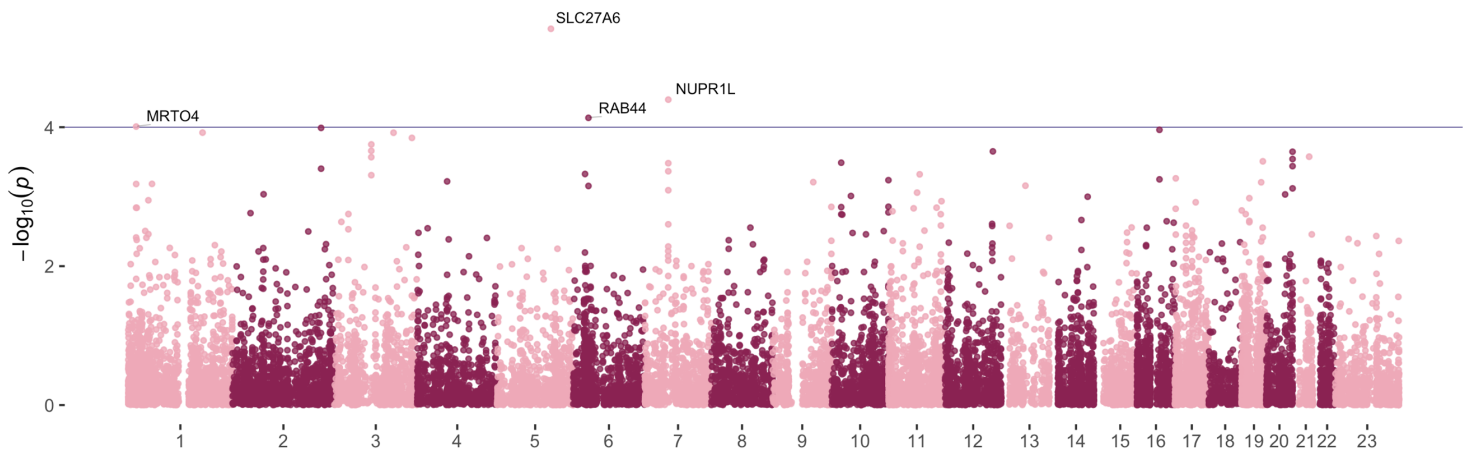

**Supplementary Figure 19.2** Manhattan plot showing the  $-\log_{10}$  p-values for the MAGMA gene analysis (based on the GWEIS SNP-environment interaction results). Suggestively significant genes ( $p < 1e-4$ ) have been annotated.

# Illness, Injury, Bereavement, Stress in the Last 2 years

## GWEIS

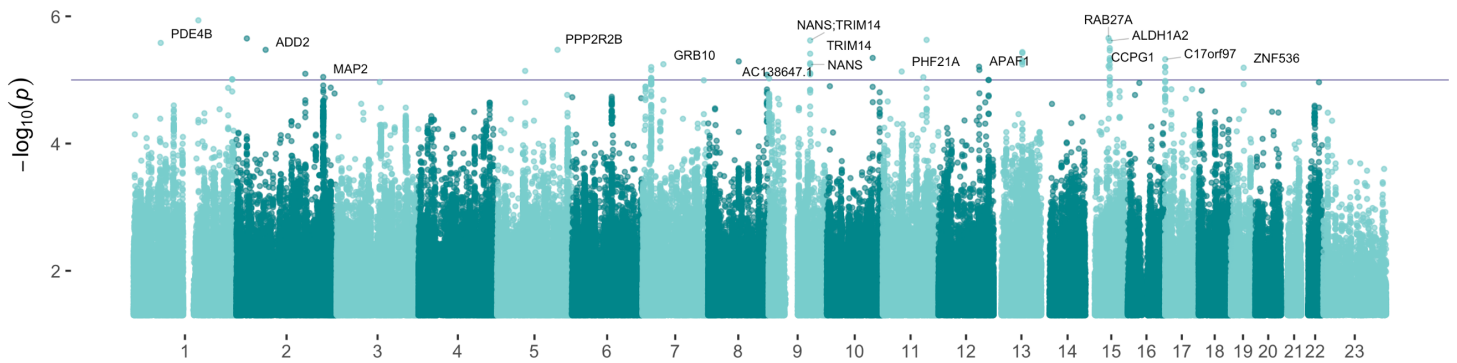

**Supplementary Figure 20.1** Manhattan plot showing the  $-\log_{10}$  SNP-environment interaction  $p$ -values from the GWEIS. Gene labels have been annotated to suggestively significant ( $p < 1e-5$ ) intragenic SNPs with the lowest  $p$ -value. (Only SNPs with  $p < .05$  were plotted).

## Gene Analysis

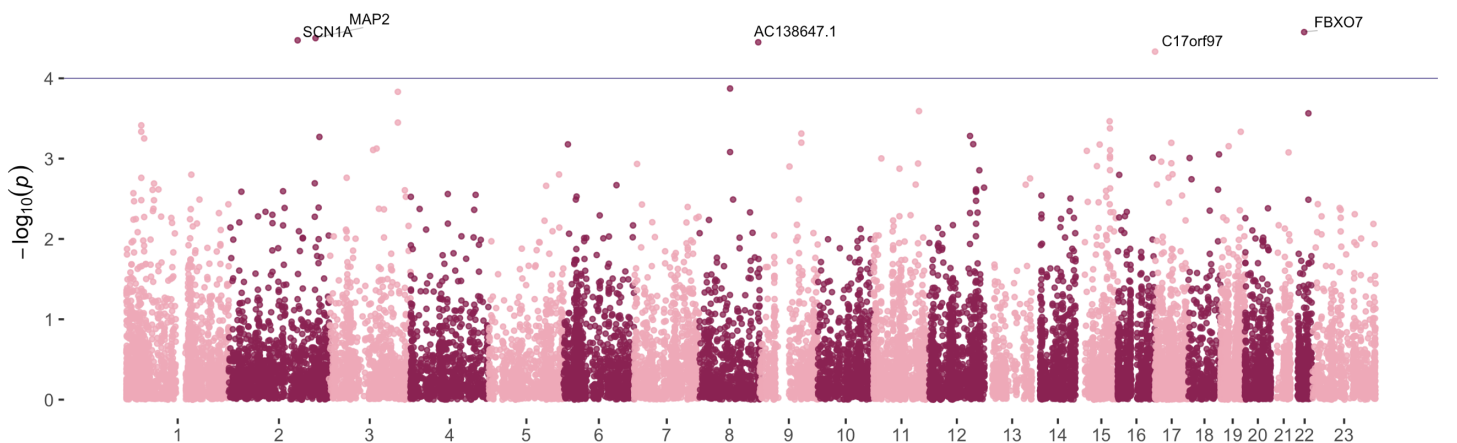

**Supplementary Figure 20.2** Manhattan plot showing the  $-\log_{10}$   $p$ -values for the MAGMA gene analysis (based on the GWEIS SNP-environment interaction results). Suggestively significant genes ( $p < 1e-4$ ) have been annotated.

## Smoking Status GWEIS

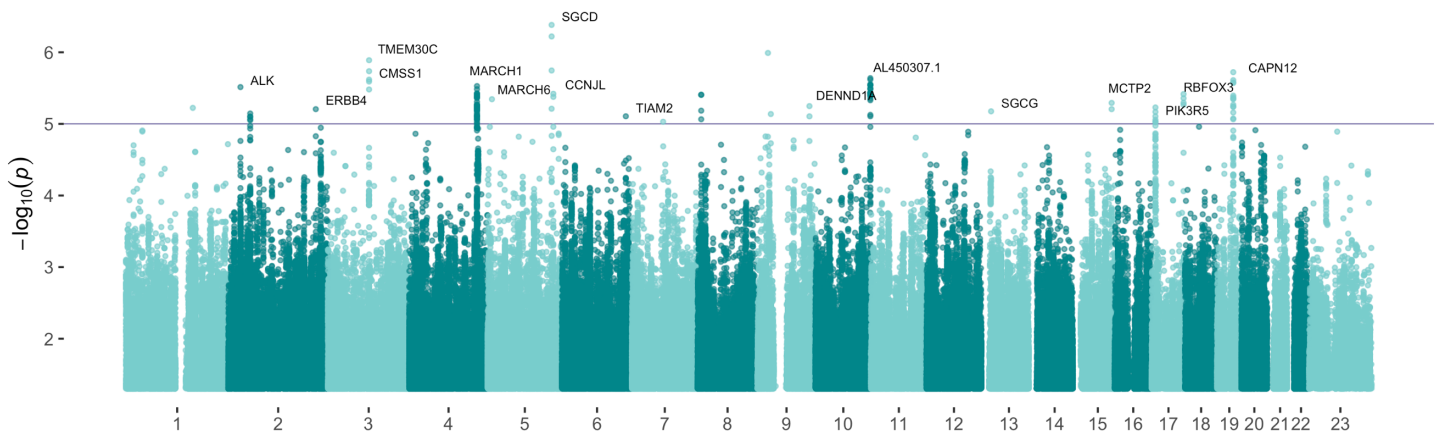

**Supplementary Figure 21.1** Manhattan plot showing the  $-\log_{10}$  SNP-environment interaction p-values from the GWEIS. Gene labels have been annotated to suggestively significant ( $p < 1e-5$ ) intragenic SNPs with the lowest p-value. (Only SNPs with  $p < .05$  were plotted).

## Gene Analysis

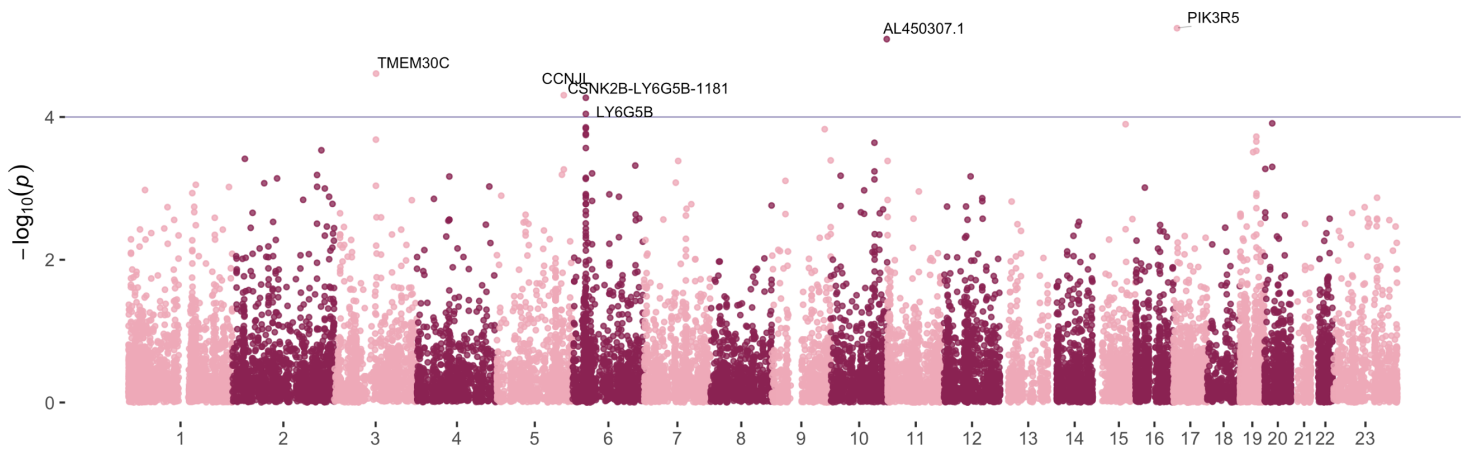

**Supplementary Figure 21.2** Manhattan plot showing the  $-\log_{10}$  p-values for the MAGMA gene analysis (based on the GWEIS SNP-environment interaction results). Suggestively significant genes ( $p < 1e-4$ ) have been annotated.



# Physically Abused by Family as a Child

## GWEIS

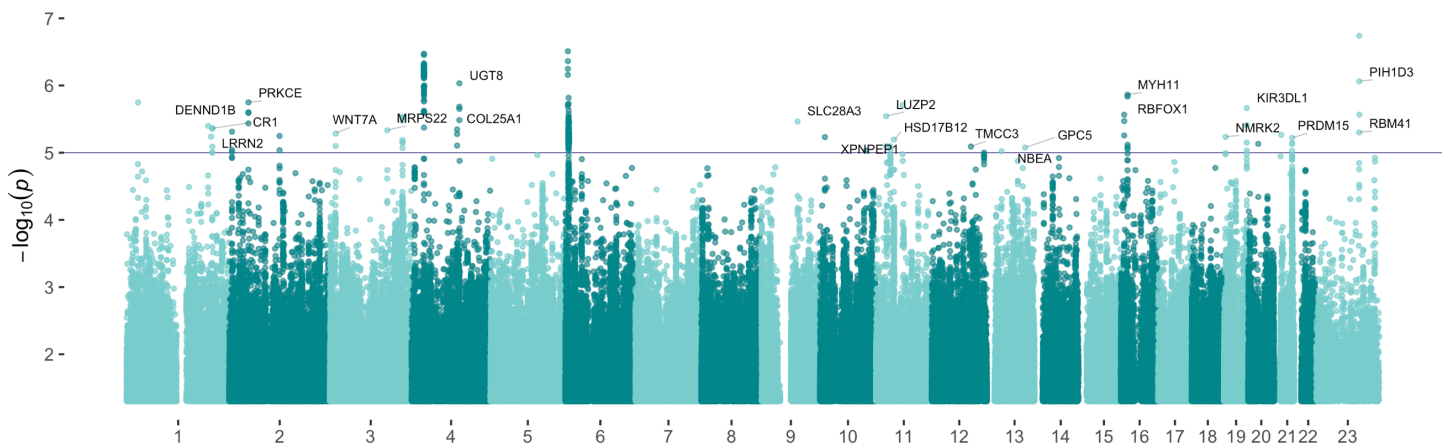

**Supplementary Figure 22.1** Manhattan plot showing the  $-\log_{10}$  SNP-environment interaction  $p$ -values from the GWEIS. Gene labels have been annotated to suggestively significant ( $p < 1e-5$ ) intragenic SNPs with the lowest  $p$ -value. (Only SNPs with  $p < .05$  were plotted).

## Gene Analysis

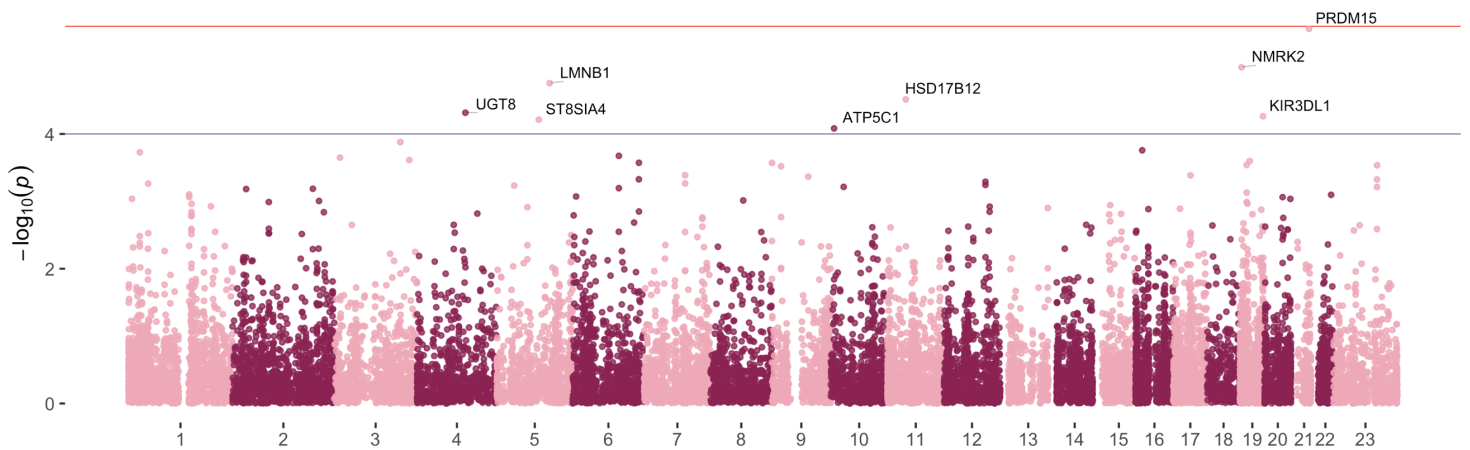

**Supplementary Figure 22.2** Manhattan plot showing the  $-\log_{10}$   $p$ -values for the MAGMA gene analysis (based on the GWEIS SNP-environment interaction results). Suggestively significant genes ( $p < 1e-4$ ) have been annotated.

# Felt Loved as a Child

## GWEIS

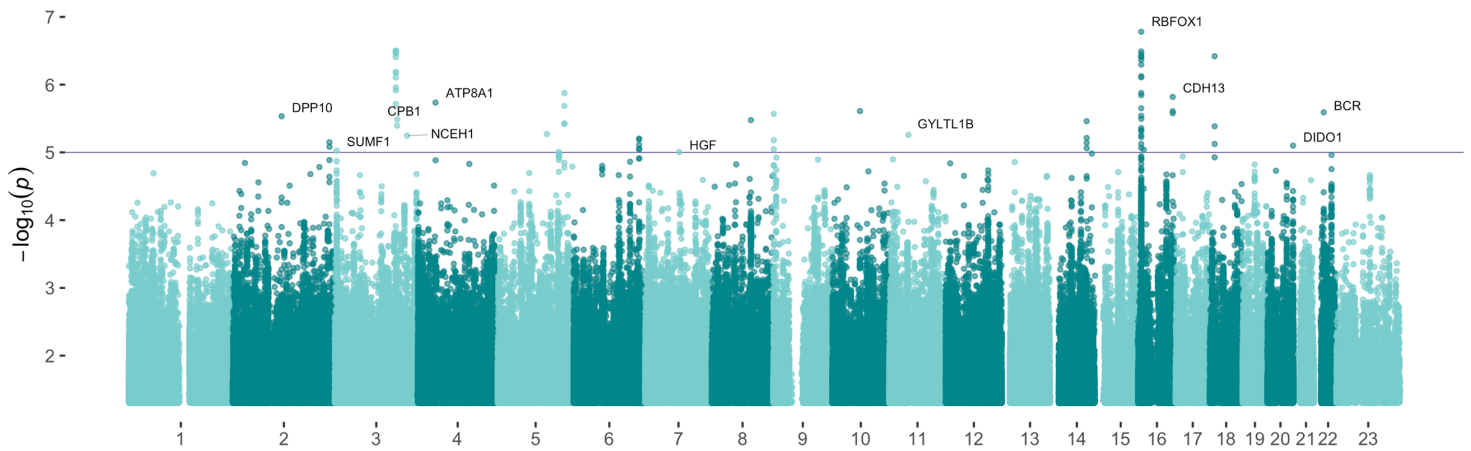

**Supplementary Figure 23.1** Manhattan plot showing the  $-\log_{10}$  SNP-environment interaction  $p$ -values from the GWEIS. Gene labels have been annotated to suggestively significant ( $p < 1e-5$ ) intragenic SNPs with the lowest  $p$ -value. (Only SNPs with  $p < .05$  were plotted).

## Gene Analysis

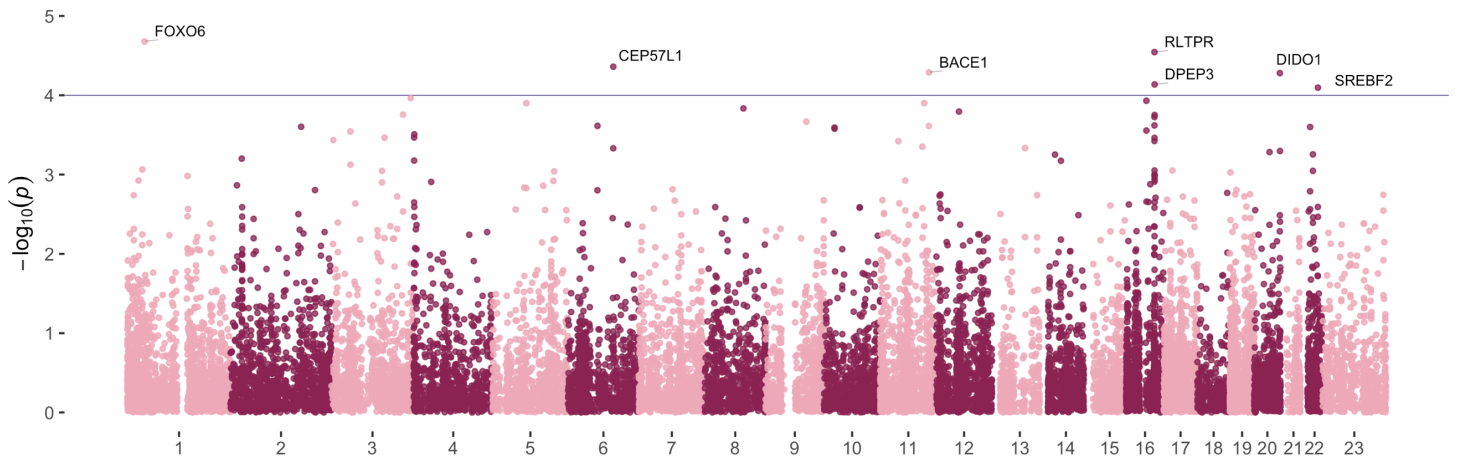

**Supplementary Figure 23.2** Manhattan plot showing the  $-\log_{10}$   $p$ -values for the MAGMA gene analysis (based on the GWEIS SNP-environment interaction results). Suggestively significant genes ( $p < 1e-4$ ) have been annotated.

# Victim of Physically Violent Crime

## GWEIS

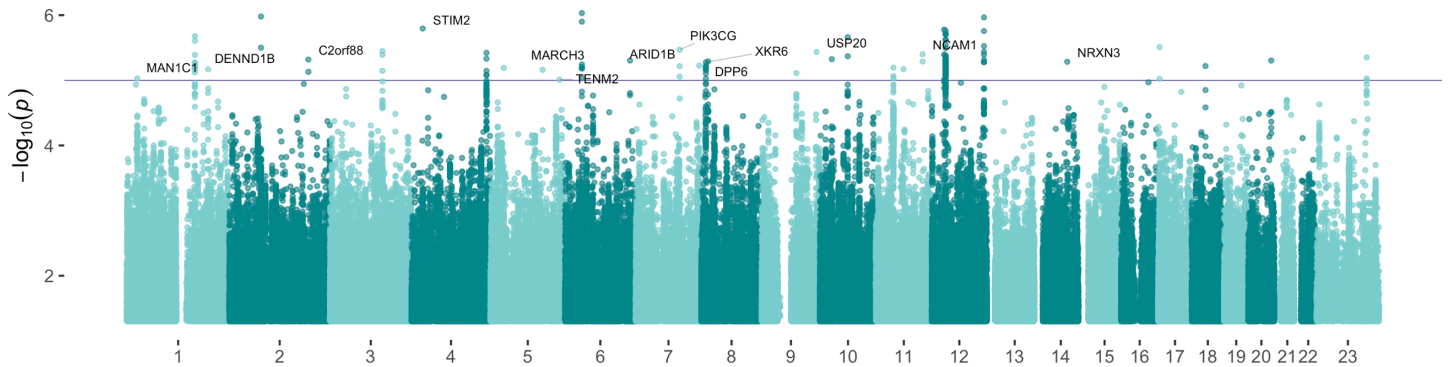

**Supplementary Figure 24.1** Manhattan plot showing the  $-\log_{10}$  SNP-environment interaction  $p$ -values from the GWEIS. Gene labels have been annotated to suggestively significant ( $p < 1e-5$ ) intragenic SNPs with the lowest  $p$ -value. (Only SNPs with  $p < .05$  were plotted).

## Gene Analysis

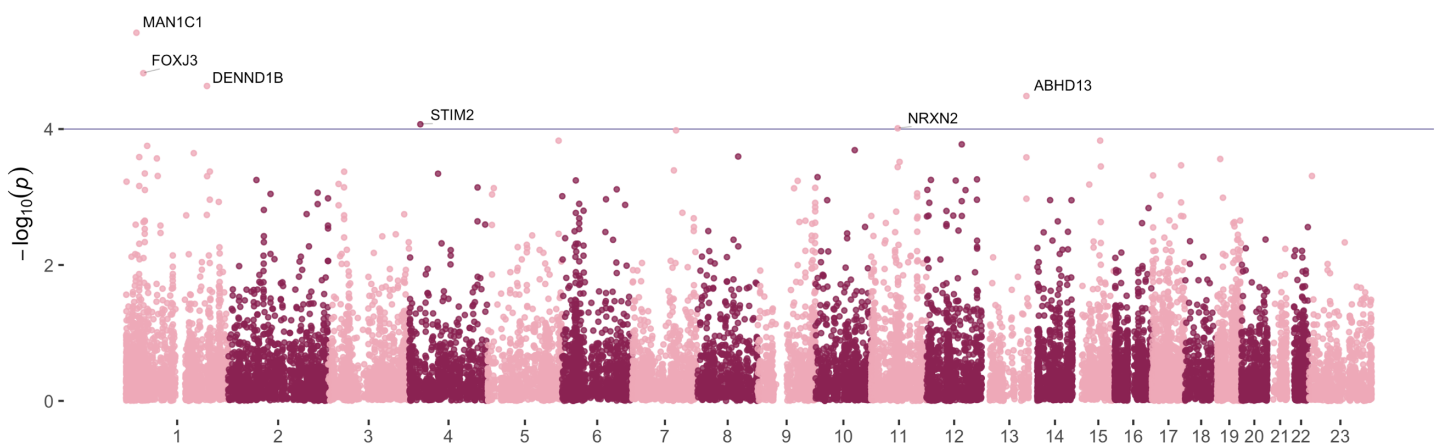

**Supplementary Figure 24.2** Manhattan plot showing the  $-\log_{10}$   $p$ -values for the MAGMA gene analysis (based on the GWEIS SNP-environment interaction results). Suggestively significant genes ( $p < 1e-4$ ) have been annotated.

# Body Mass Index (BMI)

## GWEIS

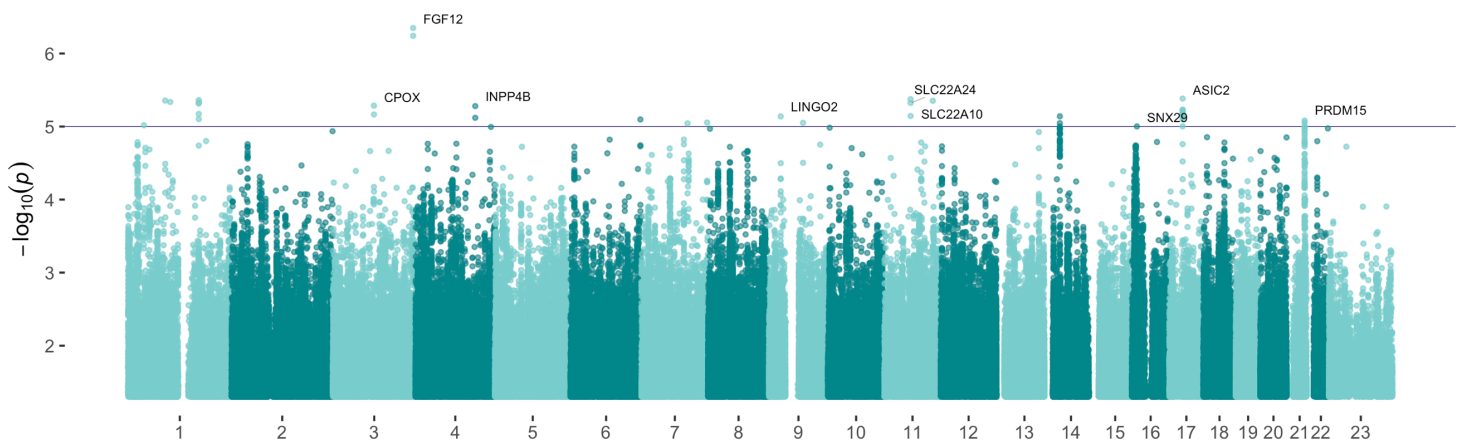

**Supplementary Figure 25.1** Manhattan plot showing the  $-\log_{10}$  SNP-environment interaction  $p$ -values from the GWEIS. Gene labels have been annotated to suggestively significant ( $p < 1e-5$ ) intragenic SNPs with the lowest  $p$ -value. (Only SNPs with  $p < .05$  were plotted).

## Gene Analysis

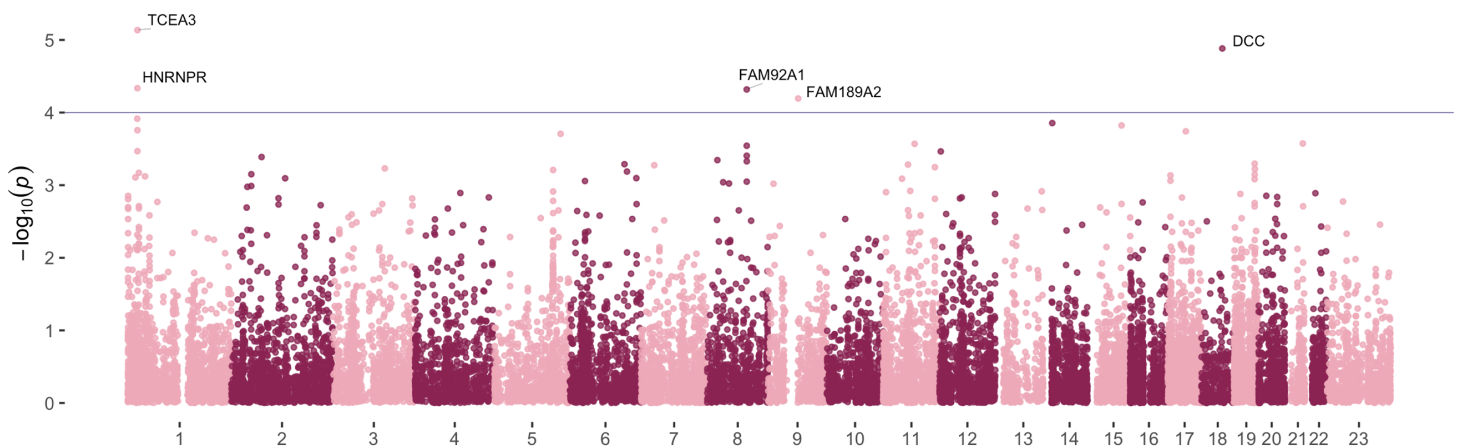

**Supplementary Figure 25.2** Manhattan plot showing the  $-\log_{10}$   $p$ -values for the MAGMA gene analysis (based on the GWEIS SNP-environment interaction results). Suggestively significant genes ( $p < 1e-4$ ) have been annotated.

# MANHATTAN PLOTS (grouped)

*This section contains all Manhattan plots from the GWEIS and gene analyses grouped together*

# GWEIS

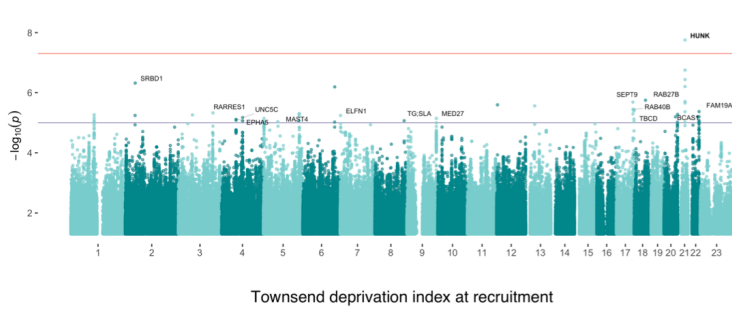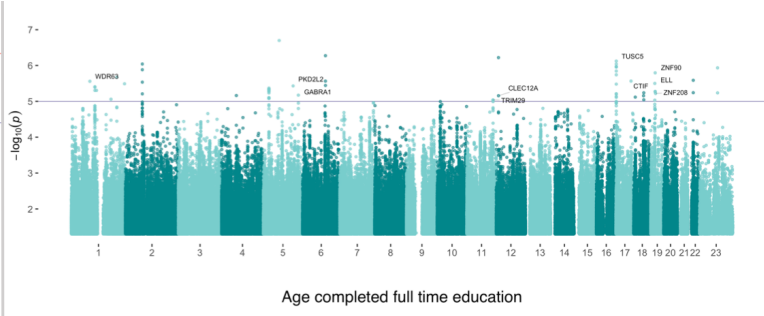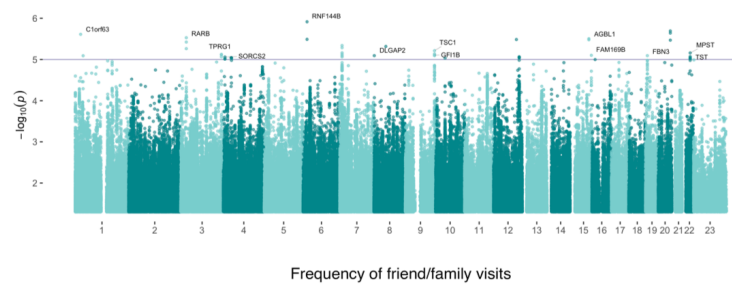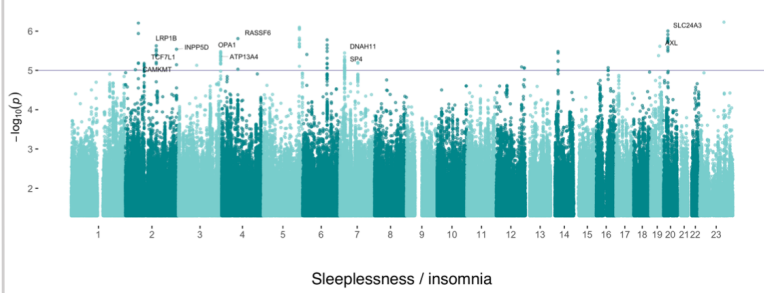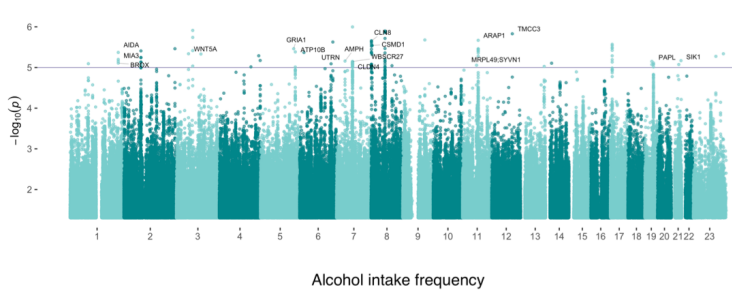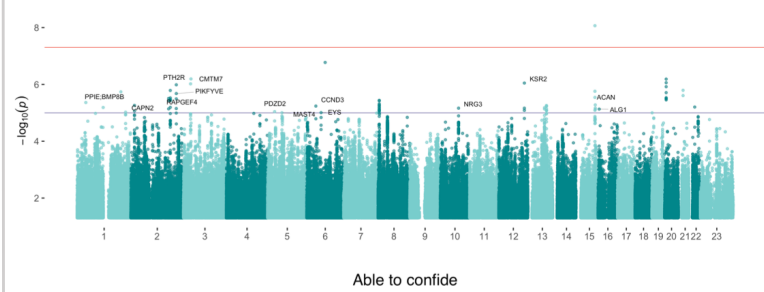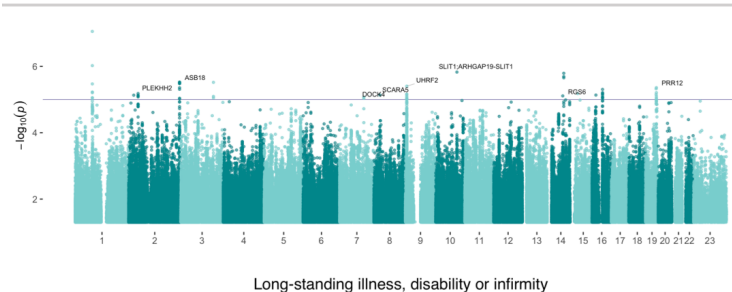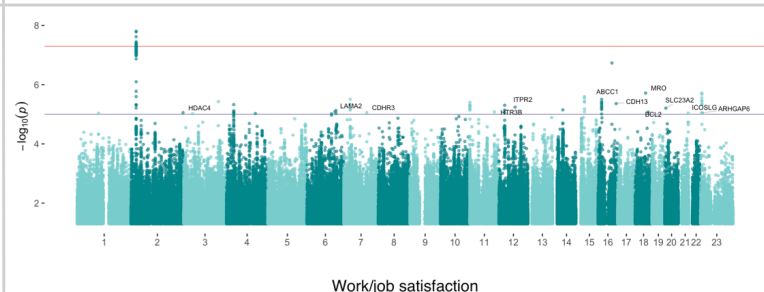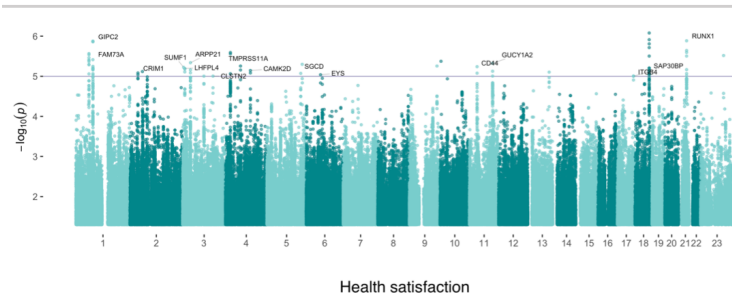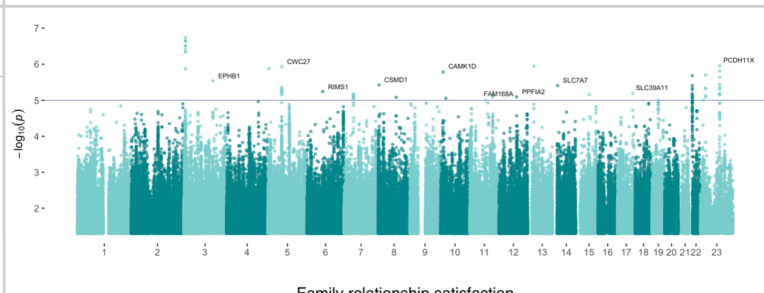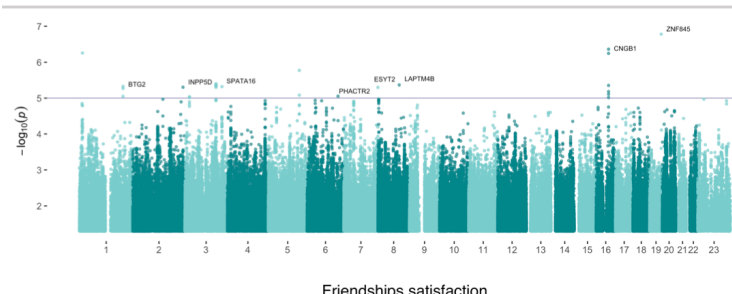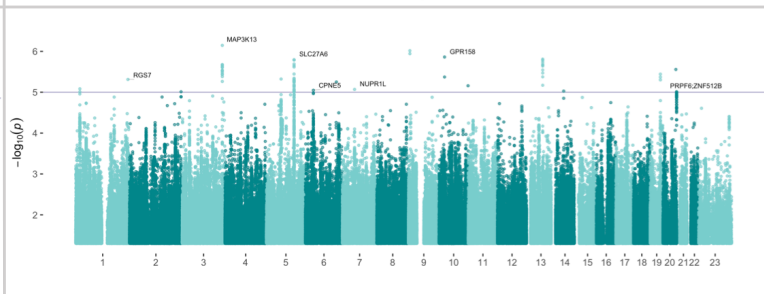

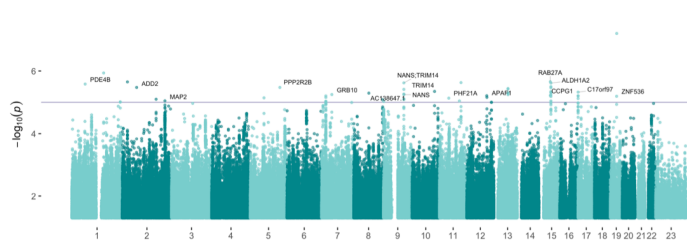

Illness, injury, bereavment, stress in the last 2 years

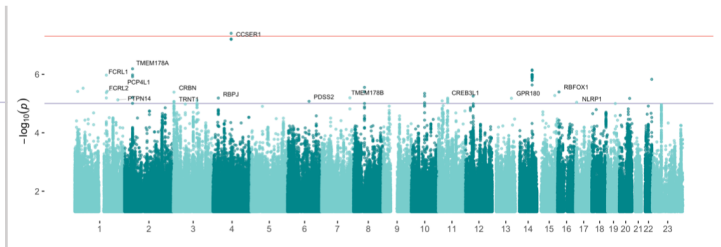

Leisure/social activities

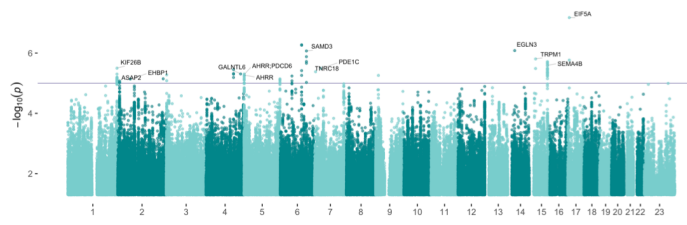

Fluid intelligence score

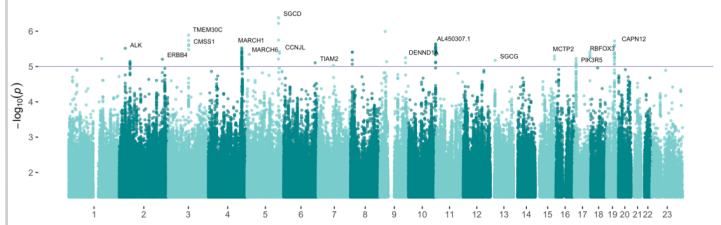

Smoking status

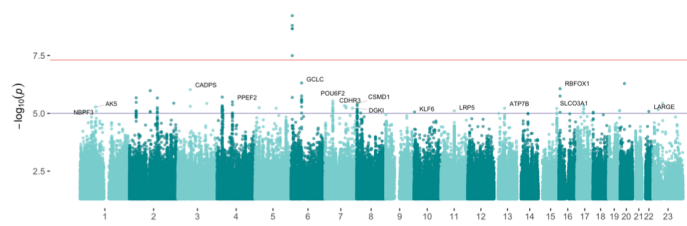

Felt hated by family member as a child

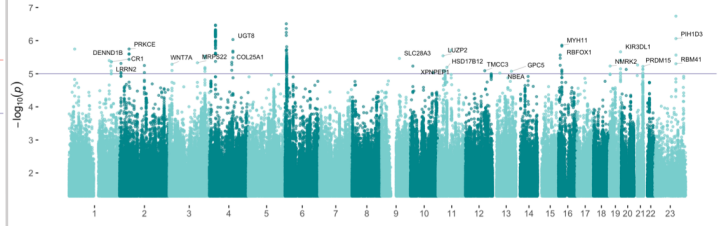

Physically abused by family as a child

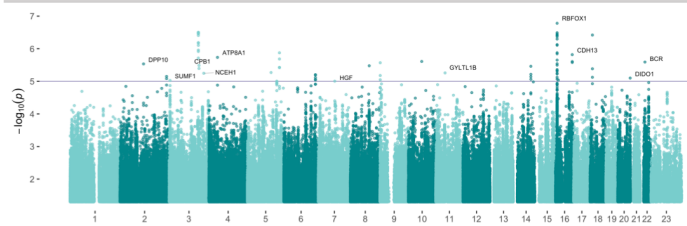

Felt loved as a child

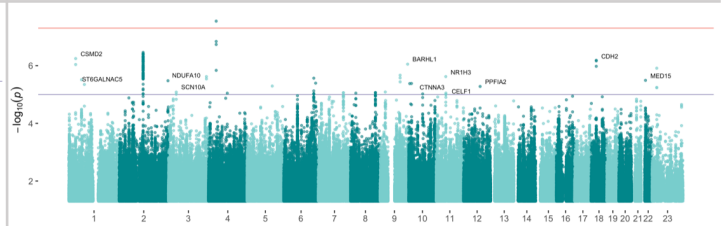

Been in a confiding relationship as an adult

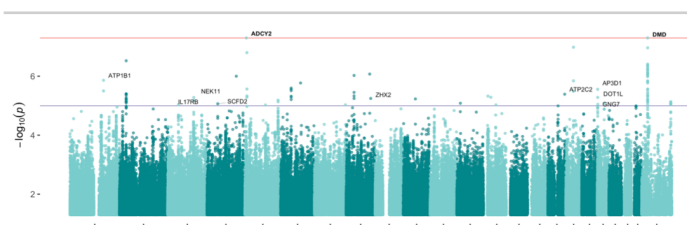

Diagnosed with life-threatening illness

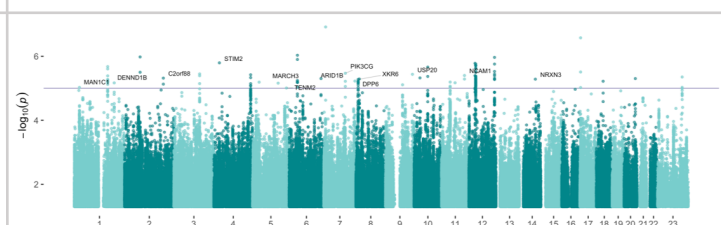

Victim of physically violent crime

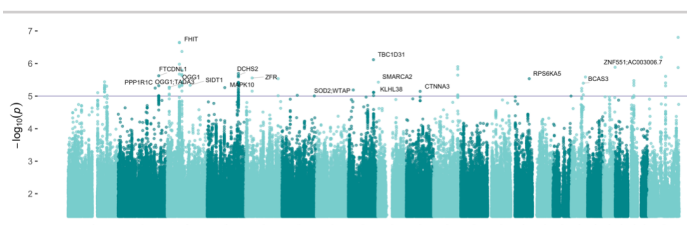

Victim of sexual assault

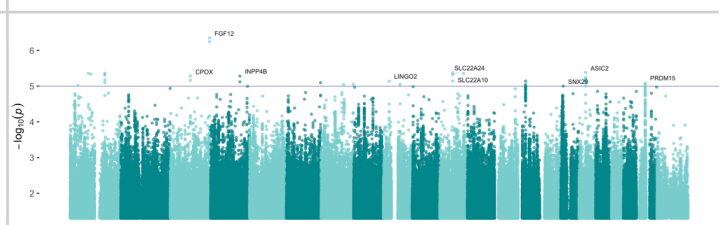

Body mass index (BMI)

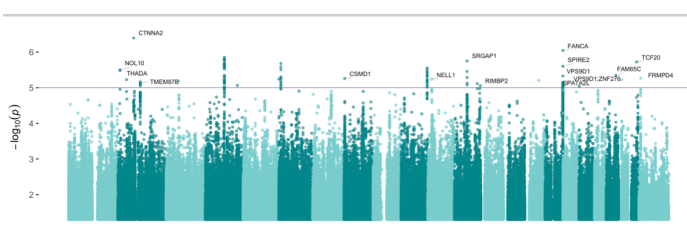

Pain for 3+ months

# Gene Analysis

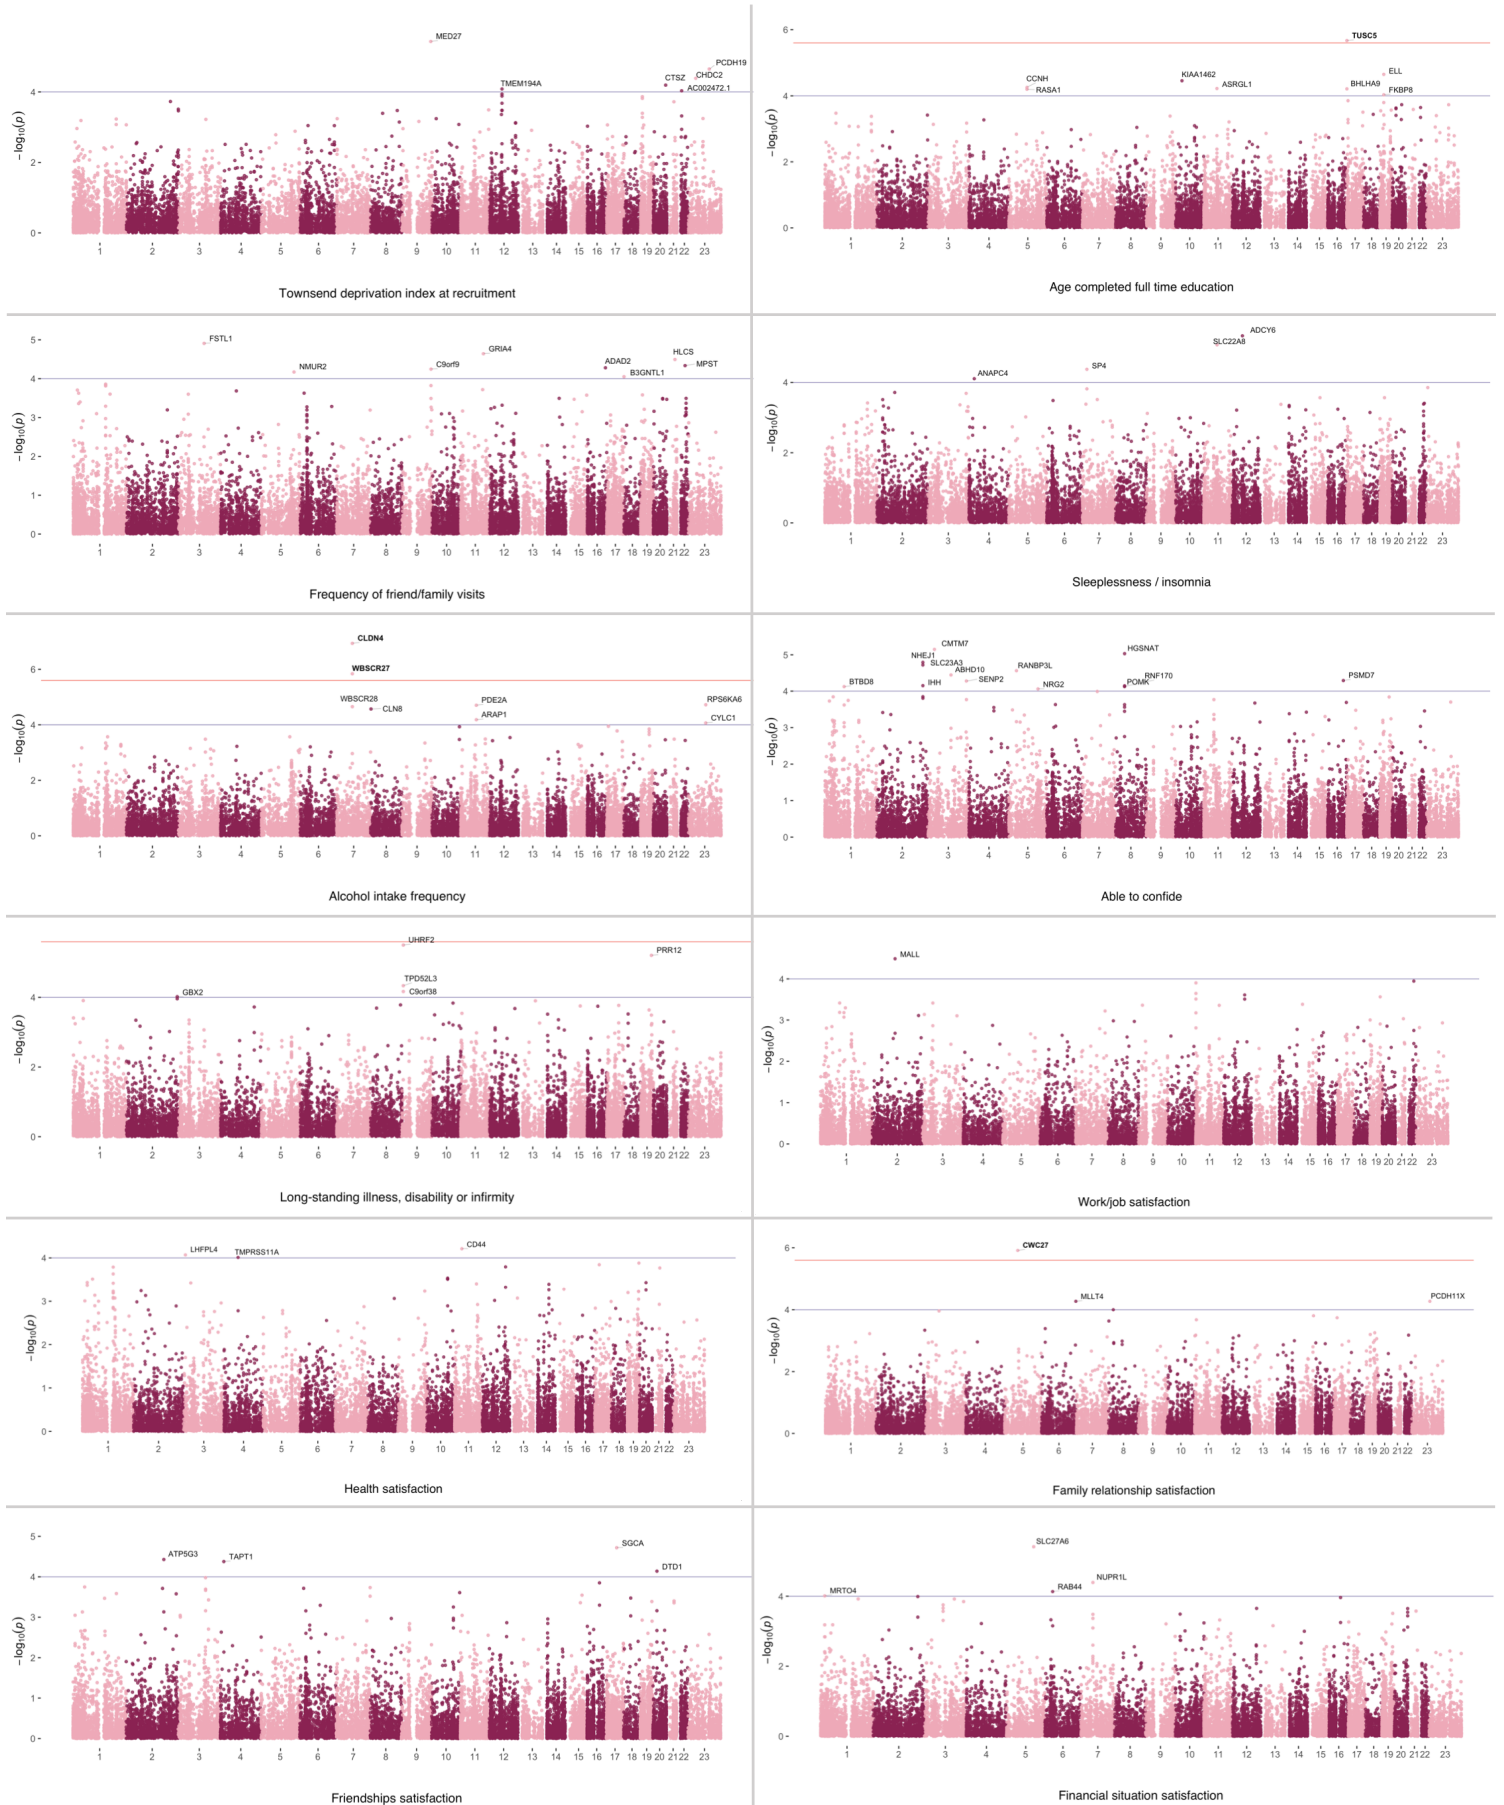



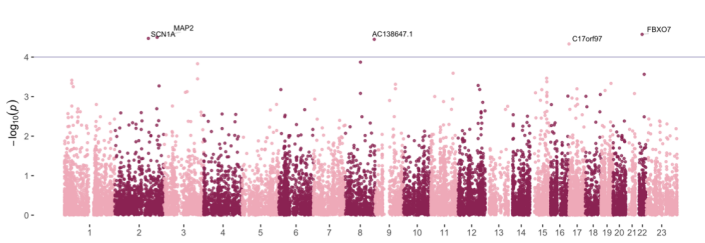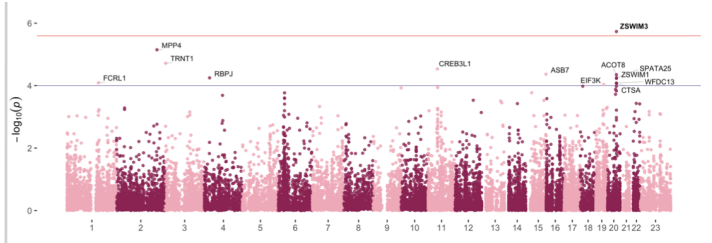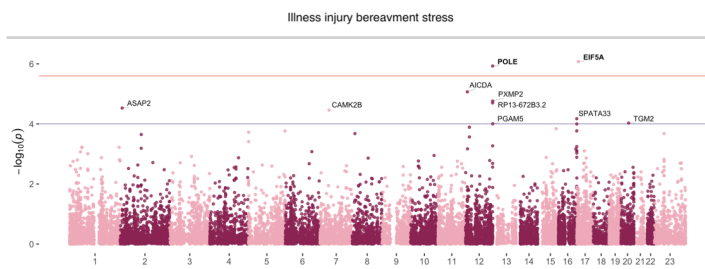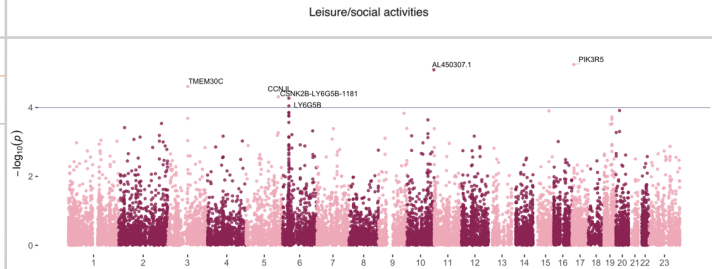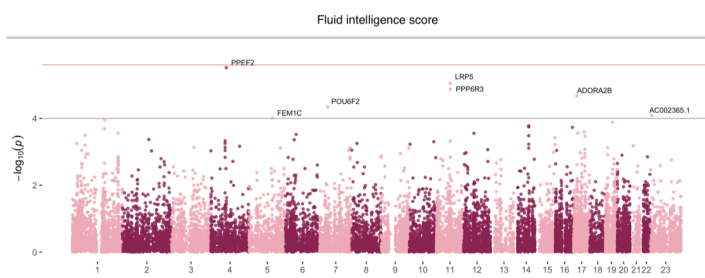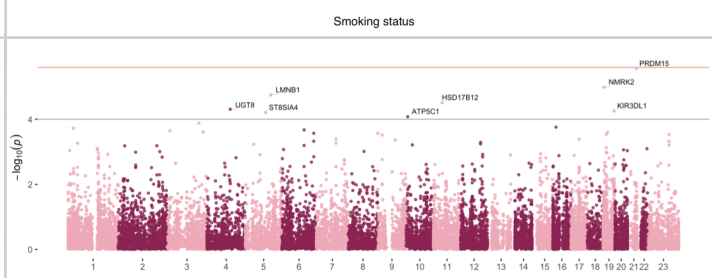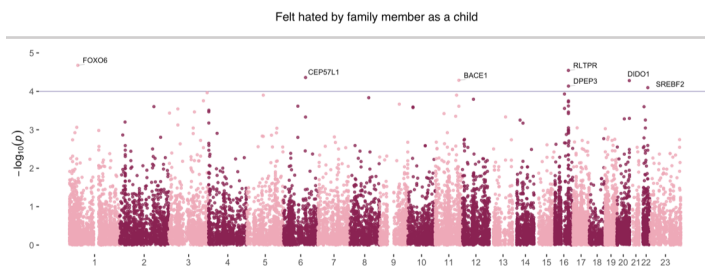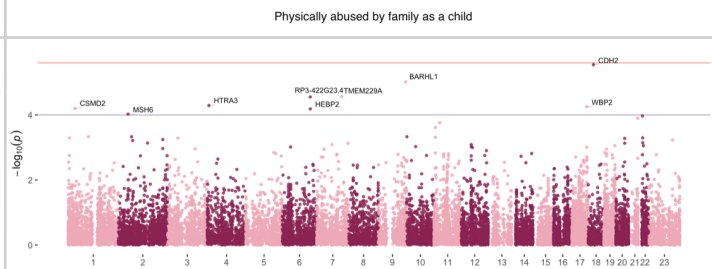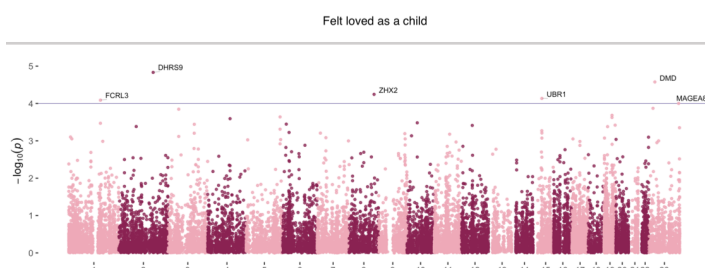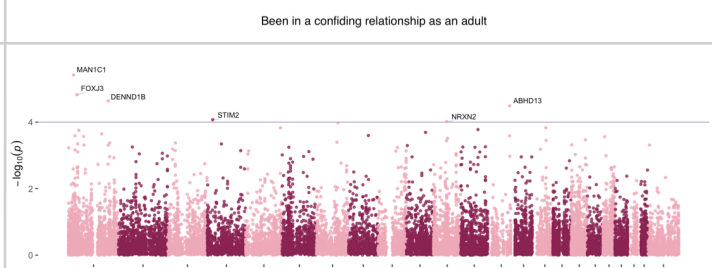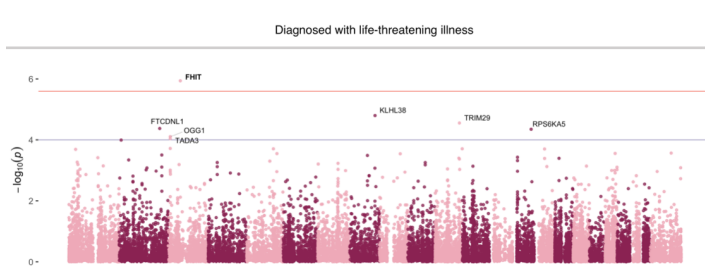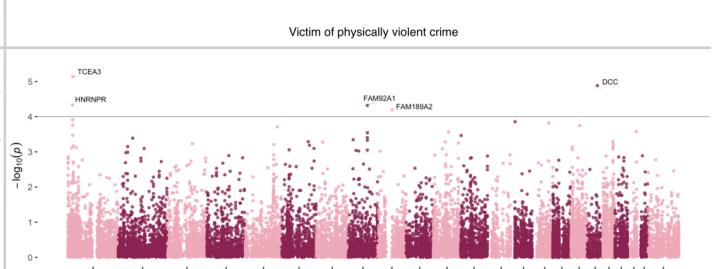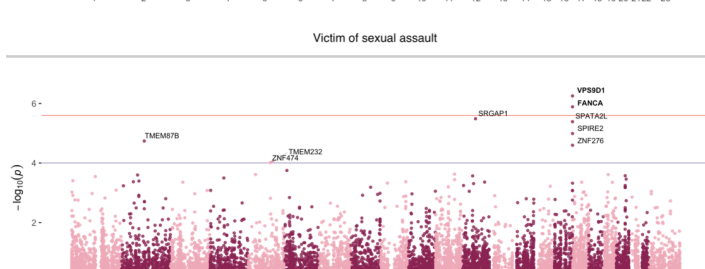

Supplement: 41398_2021_1288_MOESM1_ESM.pdf [file 41398_2021_1288_MOESM1_ESM.pdf]
